1 **PLZF is a new substrate of CRBN with thalidomide and 5-**  
2 **hydroxythalidomide**

3 Satoshi Yamanaka<sup>1</sup>, Hidetaka Murai<sup>2</sup>, Daisuke Saito<sup>2#</sup>, Gembu Abe<sup>2</sup>, Etsuko Tokunaga<sup>3</sup>,  
4 Takahiro Iwasaki<sup>4</sup>, Hirotaka Takahashi<sup>1</sup>, Hiroyuki Takeda<sup>4</sup>, Takayuki Suzuki<sup>5</sup>, Norio  
5 Shibata<sup>3</sup>, Koji Tamura<sup>2</sup> & Tatsuya Sawasaki<sup>1\*</sup>

6 *<sup>1</sup>Division of Cell-Free Sciences, Proteo-Science Center, Ehime University, Matsuyama,*  
7 *790-8577 Japan, <sup>2</sup>Department of Ecological Developmental Adaptability Life Sciences,*  
8 *Graduate School of Life Sciences, Tohoku University, Sendai, 980-8578, Japan,*  
9 *<sup>3</sup>Department of Nanopharmaceutical Sciences, Nagoya Institute of Technology, Nagoya,*  
10 *466-8555, Japan, <sup>4</sup>Division of Proteo-Drug-Discovery Sciences, Proteo-Science Center,*  
11 *Ehime University, Matsuyama, 790-8577 Japan. <sup>5</sup>Avian Bioscience Research Center,*  
12 *Graduate School of Bioagricultural Sciences, Nagoya University, Nagoya, 464-8601,*  
13 *Japan.*

14 *#Present address.*

15 *Department of Biology, Faculty of Sciences, Kyushu University, Fukuoka, 819-0395 Japan.*

16

17 **\*Corresponding Author:**

18 Tatsuya Sawasaki

19 Proteo-Science Center,

20 Ehime University, Matsuyama 790-8577, Japan

21 Tel: 81-89-927-8530

22 Fax: 81-89-927-9941

23 E-mail address: sawasaki@ehime-u.ac.jp.

24

25 **Abstract**

26 **Thalidomide induces cereblon (CRBN)-dependent degradation of proteins. Human**  
27 **cytochrome P450s are thought to provide two monohydroxylated metabolites from**  
28 **thalidomide, and the metabolites are also considered to be involved in thalidomide**  
29 **effects. However, it remains unclear. We report that human PLZF/ZBTB16 is a target**  
30 **protein of CRBN with thalidomide and its derivatives, and that 5-hydroxythalidomide**  
31 **has high potential for degrading PLZF. Using a human transcription factor protein**  
32 **array produced by a wheat cell-free protein synthesis system, PLZF was found to bind**  
33 **to CRBN with thalidomide. PLZF is degraded by the CRL4<sup>CRBN</sup> complex with**  
34 **thalidomide and its derivatives. Mutagenesis analysis revealed that both 1st and 3rd**  
35 **zinc finger domains conserved in vertebrates are recognized for thalidomide-dependent**  
36 **binding and degradation by CRBN. In chicken limbs, knockdown of Plzf induced**  
37 **skeletal abnormalities, and Plzf was degraded after thalidomide or 5-**  
38 **hydroxythalidomide treatment. Our findings suggest that PLZF is a pivotal substrate**  
39 **involving thalidomide-induced teratogenesis.**

40

## 41 **Introduction**

42 In many countries, thalidomide (Fig. 1a) was widely used to treat morning sickness in  
43 pregnant women, and caused embryopathies such as limb defects, ear damage, and congenital  
44 heart diseases<sup>1-3</sup>. Handa's group in Japan found that thalidomide binds to the cereblon  
45 (CRBN) protein within the CRL4 E3 ubiquitin ligase complex and that CRBN is a key  
46 molecule for thalidomide-induced teratogenesis<sup>4</sup>. Recently many studies have reported that  
47 CRBN, by interacting with thalidomide or its derivatives, lenalidomide, pomalidomide (Fig.  
48 1a), and CC-885, changes its binding specificity to proteins, then induces ubiquitination and  
49 degradation of binding proteins such as Ikaros (IKZF1)<sup>5,6</sup>, casein kinase I<sup>7</sup>, GSPT1<sup>8</sup>, and  
50 SALL4<sup>9,10</sup>. In humans, mutations of SALL4 are found in Duane-radial ray syndrome (DRRS,  
51 Okihiro syndrome), which has phenotypic features such as limb deformities<sup>11</sup>. In *Sall4*-  
52 conditional knockout (SALL4-CKO) mice, hindlimb defects are also reported<sup>12</sup>. These  
53 findings strongly suggest that SALL4 is partially involved in teratogenesis. However, it was  
54 reported that forelimb of SALL4-CKO mice were not abnormality and posterior of hindlimb  
55 were formed in the SALL4-CKO mice. Furthermore, although thalidomide embryopathy  
56 occurs in chicken and zebrafish<sup>4</sup>, the sequence of thalidomide-binding sites in these *Sall4*s is  
57 quite different between human and these animals<sup>9</sup>, suggesting the possibility of other target  
58 proteins for teratogenesis.

59 Promyelocytic leukaemia zinc finger (PLZF), also known as ZBTB16 or ZFP145, is a  
60 transcription factor (TF) that has nine C<sub>2</sub>H<sub>2</sub>-type zinc finger domains (ZNFs)<sup>13</sup>, and is  
61 involved in a broad range of developmental and biological processes, such as haematopoiesis,  
62 limb skeletal formation, spermatogenesis, and immune regulation<sup>13-15</sup>. Loss of PLZF function  
63 in both human patients and mouse mutants indicates limb defects, which mice phenotype was

64 elongation defect of zeugopod and thumb<sup>14-16</sup>. A recent study has indicated that the 6th and  
65 7th ZNFs in PLZF were not targets of CRBN<sup>17</sup>. However, it remains unknown whether full-  
66 length PLZF protein is a target for CRBN with thalidomide.

67 Thalidomide is metabolized into 5-hydroxythalidomide and 5'-hydroxythalidomide by  
68 several types of human cytochrome P450 (CYP)<sup>18-20</sup>, which are oxidized in phthalimido and  
69 glutarimide rings, respectively (Fig. 4a). Because CRBN mainly recognizes the glutarimide  
70 ring in thalidomide<sup>21,22</sup>, 5'-hydroxythalidomide has no functions in either CRBN binding or  
71 teratogenesis<sup>23,24</sup>. Recently, mice having humanized-CYP3A that could potentially provide  
72 5-hydroxythalidomide were shown to undergo teratogenesis after thalidomide treatment<sup>25</sup>,  
73 suggesting that 5-hydroxythalidomide functions like thalidomide. However, there is no  
74 evidence to suggest whether 5-hydroxythalidomide induces interactions between CRBN and  
75 substrate proteins.

76 We aimed to identify the protein that binds thalidomide-dependently to CRBN. For this,  
77 we constructed a human TF protein array (HuTFPA) consisting of 1,118 human recombinant  
78 proteins including mainly TFs and zinc finger proteins (Supplementary Table 1), which was  
79 produced using a wheat cell-free protein production system. Biochemical screening based on  
80 an interaction between TF and CRBN with thalidomide using the AlphaScreen system,  
81 identified PLZF as an interactor of CRBN with thalidomide. PLZF was shown to be a novel  
82 substrate of the CRL4<sup>CRBN</sup> E3 ubiquitin ligase complex with thalidomide, its derivatives, and  
83 5-hydroxythalidomide. Amino acid sequences of PLZF were very similar among vertebrates.  
84 In the chick embryo, knockdown of *Plzf/Zbtb16* induced abnormal limb development. More  
85 importantly, *Plzf* protein was decreased in the limb buds during thalidomide-induced  
86 teratogenesis, whereas expression level of *Sall4* protein was not changed.



87

## 88 **Results**

### 89 **Screening for thalidomide-dependent substrates of CRBN using a human transcription** 90 **factor protein array.**

91 Many TFs function as master regulators during development and differentiation of  
92 embryos. In addition, many substrates of CRBN with thalidomide were ZNF-type TFs such  
93 as IKZF1<sup>5,6</sup>, IKZF3<sup>5,6</sup>, and SALL4<sup>9,10</sup>. We aimed to identify new substrates of CRBN with  
94 thalidomide from human TFs. Based on a wheat cell-free protein synthesis system<sup>26</sup>, we had  
95 previously developed a technology for the construction of a protein array that synthesizes an  
96 individual protein in each well of a 96- or 384-well plate, and have published many reports  
97 regarding the identification of substrate proteins of protein kinase<sup>27</sup> and E3 ligase<sup>28,29</sup> protein  
98 arrays. The combination of our protein array and AlphaScreen technology provides several  
99 advantageous features for the screening of protein-protein interactions: it is 1) used directly  
100 without protein purification, 2) highly sensitive, and 3) a high-throughput system. The human  
101 TF protein array (HuTFPA) consisting of mainly human TFs (Supplementary Table 1),  
102 synthesized as N-terminal FLAG-GST fusions, produced by a wheat cell-free system. CRBN  
103 was synthesized as an N-terminal single biotin-labelled form, using the same system. The  
104 principle of detecting this biochemical interaction is shown in Fig. 1b. Using this cell-free  
105 system, an interaction between FLAG-GST-IKZF1 and biotinylated CRBN was thalidomide  
106 dose-dependently detected using the AlphaScreen method (Fig. 1c). As shown in the  
107 flowchart (Supplementary Fig. 1a), we screened the substrate human TFs of CRBN with  
108 thalidomide (50  $\mu$ M) on the HuTFPA, identifying six TF proteins as being CRBN binding  
109 proteins in the presence of thalidomide (Fig. 1d). In contrast, several known substrates such

110 as IKZF3 and CK1 $\alpha$ , were not detected because these substrates were not included in the  
111 HuTFPA (Supplementary Table 1).

112 To investigate the thalidomide dependency of these proteins for CRBN binding, the  
113 biochemical assay was carried out with and without thalidomide. Three human TFs, IKZF1,  
114 SALL4, and PLZF, indicated characteristics of thalidomide-dependent binding to CRBN (Fig.  
115 1e), whereas HNRNPK, HMGB2, and ELF5 bound to CRBN without thalidomide.  
116 Furthermore, in the presence of thalidomide, these did not bind to mutant CRBN-YW/AA<sup>3</sup>  
117 that is unable to bind to thalidomide (Supplementary Fig. 1b). Using recombinant proteins,  
118 *in vitro* pull-down assay confirmed that PLZF binds to wild-type (WT) CRBN in the presence  
119 of thalidomide (Supplementary Fig. 1c), as do IKZF1 and SALL4, whereas this binding was  
120 not observed under the condition of using mutant CRBN-YW/AA (MT) and no addition of  
121 thalidomide (-). These results indicate that PLZF is an interactor of CRBN with thalidomide.

## 122 **PLZF binds to CRBN with thalidomide, pomalidomide, and lenalidomide.**

123 Through the screening above, PLZF was identified as a candidate substrate for CRBN  
124 with thalidomide. PLZF is classified as being part of the ZBTB (zinc finger and bric à brac,  
125 tramtrack, and broad) protein family<sup>13</sup>. Since the other ZBTB proteins are included in the  
126 HuTFPA, these were analysed for interactions with or without thalidomide. However, the  
127 ZBTB proteins did not bind to CRBN with thalidomide (Supplementary Fig. 1d), suggesting  
128 that CRBN with thalidomide recognizes a specific region(s) in PLZF, but not one common  
129 to the ZBTB family.

130 During the last two decades, two thalidomide derivatives, lenalidomide and pomalidomide  
131 (Fig. 1a), have been developed for multiple myeloma (MM) or as immunomodulatory drugs

132 (IMiDs)<sup>30</sup>. Recent studies have reported that some proteins have different preferences  
133 between thalidomide and its derivatives for binding to CRBN<sup>7,9</sup>. For an example, a CK1 $\alpha$ -  
134 CRBN interaction is enabled by lenalidomide, but not thalidomide or pomalidomide<sup>7</sup>. We  
135 therefore investigated the biochemical characteristics of interactions between PLZF and  
136 CRBN with thalidomide and its two derivatives. As a result, thalidomide, pomalidomide and  
137 lenalidomide induced PLZF-CRBN interaction, and it is showed that the biochemical  
138 binding potency is pomalidomide>lenalidomide>thalidomide (Fig. 1f). In a previous report<sup>9</sup>,  
139 it was showed that thalidomide and its two derivatives induced degradation of SALL4. In  
140 addition, in vitro binding assay using the AlphaScreen method confirmed that SALL4's  
141 binding potency is pomalidomide>thalidomide>lenalidomide (Supplementary Fig. 1e).  
142 Because the binding potency of PLZF-thalidomide is similar to that of SALL4-lenalidomide,  
143 it was predicted that PLZF and SALL4 are pan-substrates on thalidomide and its two  
144 derivatives.

145

#### 146 **PLZF is degraded by the CRL4<sup>CRBN</sup> complex with thalidomide and its derivatives.**

147 CRBN consists of a CRL4<sup>CRBN</sup> E3 ubiquitin ligase complex which includes DDB1,  
148 RBX1, and CUL4<sup>4</sup>. Therefore, the PLZF-CRBN interaction with thalidomide and its two  
149 derivatives is expected to lead to degradation of PLZF. For a cell-based immunoblotting assay,  
150 we used the AGIA-tag system because it is a highly-sensitive tag based on a rabbit  
151 monoclonal antibody<sup>31</sup>. To investigate the stability of PLZF or SALL4, AGIA-tagged PLZF  
152 or SALL4 was transfected into HEK293T cells with thalidomide, pomalidomide, and  
153 lenalidomide. These compounds all decreased the stability of PLZF and SALL4  
154 (Supplementary Fig. 2a). In addition, to demonstrate whether PLZF is also pan-substrate,

155 such as SALL4, endogenous PLZF or SALL4 protein levels were examined in HuH7 or  
156 HEK293T cells treated with thalidomide and its two derivatives. Immunoblot analyses  
157 revealed that endogenous PLZF were destabilized by all of them in both cell lines  
158 (Supplementary Fig. 2b and c), indicating that PLZF is also pan-substrate on thalidomide and  
159 its two derivatives. To reduce experimental complexity, therefore, we focused thalidomide  
160 and lenalidomide in further analyses. A remarkable decrease in PLZF was observed 6 hours  
161 after lenalidomide treatment (Supplementary Fig. 2d). This time course analysis suggests that  
162 the reduction in PLZF was late as compared to other CRBN substrates because degradations  
163 of IKZF1, IKZF3, and SALL4 were observed only 3 hours after the treatment<sup>5,6,9</sup>. The  
164 lenalidomide-dependent destabilisation of PLZF was completely inhibited by the proteasome  
165 inhibitor MG132 and the NEDD8 inhibitor MLN4924 (Fig. 2a), suggesting that PLZF is  
166 ubiquitinated by the CRL4 complex for degradation by the proteasome.

167 To investigate whether the destabilisation of PLZF is dependent on CRBN, we made  
168 CRBN-deficient HEK293T cells using CRISPR/Cas9. In the presence of lenalidomide,  
169 degradation of endogenous PLZF was observed in normal HEK293T cells, whereas  
170 endogenous PLZF was not degraded in CRBN-deficient cells (Fig. 2b). Endogenous PLZF  
171 protein was also reduced by lenalidomide in HuH7 and THP-1 cells (Supplementary Fig. 3b  
172 and c). Expression of endogenous *PLZF* mRNA in these cells was unaffected by lenalidomide  
173 treatment (Supplementary Fig. 3a-c). In addition, the FLAG-CRBN mutant (YW/AA) did  
174 not degrade AGIA-PLZF in the presence of lenalidomide (Supplementary Fig. 2e),  
175 suggesting the CRBN-dependent degradation of PLZF.

176 We next investigated whether PLZF is recruited to the CRL4<sup>CRBN</sup> complex and  
177 ubiquitinated. By immunoprecipitation of FLAG-CRBN using an anti-FLAG antibody, the

178 CRL4<sup>CRBN</sup> complex consisting of DDB1, RBX1, and CUL4 was pulled-down. At the same  
179 time AGIA-tagged PLZF was also strongly associated with the complex after thalidomide or  
180 lenalidomide treatment (Fig. 2c and Supplementary Fig. 4a), indicating that PLZF is  
181 thalidomide- or its two derivatives-dependently included in the CRL4<sup>CRBN</sup> complex. In  
182 addition, to analyse the ubiquitination of PLZF, AGIA-PLZF was transfected with FLAG-  
183 CRBN and immunoprecipitated for immunoblotting. The smear band resulting from the  
184 immunoprecipitation of AGIA-PLZF was increased by supplementation with thalidomide or  
185 lenalidomide, suggesting that PLZF ubiquitination was induced by thalidomide and its two  
186 derivatives treatment (Fig. 2d and Supplementary Fig. 4b). Next, to investigate the *in vitro*  
187 ubiquitination of PLZF, CRL4<sup>FLAG-CRBN</sup> and AGIA-PLZF were coimmunoprecipitated by  
188 anti-FLAG antibody in the presence or absence of lenalidomide (lane 5-8 in Fig. 2e). As  
189 negative control, empty vector or AGIA-PLZF expressing HEK293T cells were lysed and  
190 mixed, and the lysates were immunoprecipitated by anti-AGIA antibody to demonstrate the  
191 ubiquitination of PLZF caused by CRL4<sup>FLAG-CRBN</sup> (lane 1-4 in Fig. 2e). When  
192 coimmunoprecipitating PLZF and CRBN plus exogenous E1 and E2 enzymes, PLZF was  
193 ubiquitinated in the presence of lenalidomide (lane 8 in Fig. 2e), but not in its absence (lane  
194 6 in Fig.2e), indicating that CRL4<sup>FLAG-CRBN</sup> ubiquitinates PLZF *in vitro*. Taken together, these  
195 results show that PLZF is a target of the CRL4<sup>CRBN</sup> complex for proteasome degradation.

196 Next, because it was reported that PLZF play important role in immune responses<sup>13</sup>,  
197 we investigated whether degradation of PLZF is also caused in lymphoma cell lines.  
198 Immunoblot analyses showed that IMiD treatment induced protein degradation of PLZF in  
199 ABC-DLBCL (TK), GCB-DLBCL (BJAB and HT), Adult T-cell lymphoma/ATL (MT-4),  
200 and Burkitt's lymphoma (Raji) cell lines (Supplementary Fig. 5a and b). In GCB-DLBCL  
201 (SU-DHL-4) cells, IMiD treatment scarcely induced protein degradation of PLZF but protein

202 expression of CRBN in SU-DHL-4 cells was very weak (Supplementary Fig. 5a). These  
203 results strongly suggest that PLZF degradation is caused by IMiD treatment in various cells.

204

205 **Both ZNF1 and ZNF3 domains in PLZF are recognized for its thalidomide-dependent**  
206 **interaction with CRBN.**

207 We next attempted to determine the thalidomide-dependent CRBN interaction region  
208 within PLZF. PLZF has a single BTB domain and nine ZNFs<sup>13</sup> (Fig. 3a). A single ZNF  
209 domain present in IKZF1<sup>17</sup> and SALL4<sup>9,10</sup> is recognized by CRBN with thalidomide.  
210 Expectedly, the BTB domain alone in PLZF did not induce CRBN binding (Fig. 3b). We thus  
211 constructed a total of five clones lacking different ZNFs by N-terminal FLAG-GST-fusions,  
212 then measured the interaction signals between each clone and CRBN with thalidomide. As a  
213 result, a ZNF1-5 clone indicated sufficient binding ability to CRBN with thalidomide (Fig.  
214 3b). To refine the key domains on the native form of PLZF, each of the five ZNFs were  
215 individually swapped with ZNF7 (Fig. 3c), as this had no effect on binding<sup>17</sup>. These binding  
216 assays showed that the ZNF1 and ZNF3 domains were most important for binding (Fig. 3d).  
217 In previous reports, a glycine residue in a ZNF domain of SALL4 and ZFP91 proteins was  
218 shown to be a key amino acid for binding to CRBN with thalidomide<sup>9,10,32</sup>. We thus made  
219 mutant clones (Gly to Ala shown in Fig. 3e) having a single or double substitution in ZNF1  
220 and ZNF3, which were then analysed in biochemical (Fig. 3f) and cell-based (Fig. 3g) assays.  
221 Surprisingly, the double mutation completely lost the ability for binding and degradation,  
222 whereas binding ability of both single mutants significantly low but retained degradation  
223 ability (Fig. 3f and g). Taken together, these results indicate that both ZNF1 and ZNF3  
224 domains in PLZF are recognized for binding and degradation by CRBN with thalidomide.

225

226 **5-hydroxythalidomide induces degradation of PLZF and SALL4, but not of IKZF1.**

227 5-hydroxythalidomide (Fig. 4a) is produced as a primary metabolite of thalidomide by  
228 several types of human CYP<sup>18-20</sup>. However, the function of 5-hydroxythalidomide remains  
229 unclear. We thus investigated whether it induces a CRBN–protein interaction. Surprisingly,  
230 5-hydroxythalidomide induces CRBN–PLZF and CRBN–SALL4 interactions (Fig. 4b),  
231 whereas it did not induce an interaction between CRBN and IKZF1. Furthermore, 5-  
232 hydroxythalidomide induces the degradation of PLZF and SALL4 in cells, but not of IKZF1  
233 (Fig. 4c). Endogenous PLZF and SALL4 were also degraded in HuH7 and THP-1 cells,  
234 respectively, after treatment with 5-hydroxythalidomide (Fig. 4d and e). Endogenous IKZF1  
235 showed no change in the presence of 5-hydroxythalidomide (Fig. 4e), even though PLZF was  
236 degraded under the same conditions. Notably, dose-dependency between thalidomide and 5-  
237 hydroxythalidomide in the biochemical CRBN–SALL4 interaction was almost identical  
238 (middle panel in Fig. 4b). In addition, degradations of PLZF and SALL4 by 5-  
239 hydroxythalidomide in cells occurred at almost the same levels as those in the thalidomide  
240 treatment. Taken together with the function of human CYP3A<sup>25</sup>, these results suggest that 5-  
241 hydroxythalidomide has potential similar to that of thalidomide for PLZF and SALL4  
242 degradation in humans.

243

244 **Plzf is a substrate of Crbn with thalidomide in chicken.**

245 Thalidomide-induced teratogenesis occurs in several animals, including zebrafish,  
246 chicken, and rabbit<sup>4,10</sup>. The ZNF1/3 in PLZF (Fig3) and ZNF2 in SALL4<sup>9,10</sup> are important  
247 regions for the interaction with CRBN. We thus compared these amino acid sequences among  
248 vertebrates. The sequences of the ZNF1 and ZNF3 and other ZNFs in PLZF are significantly  
249 conserved among many animals (Supplementary Fig. 6a), although the SALL4-ZNF2  
250 sequence is not (Supplementary Fig. 6b). To investigate the thalidomide-dependent  
251 degradation of Plzf or Sall4 by Crbn from other animals, the recombinant proteins of Crbn,  
252 Plzf (Zbtb16 in chicken), and Sall4 from mouse (Mm) and chicken (Gg) were biochemically  
253 analysed. In addition, Val388 of human CRBN is a key residue for thalidomide-dependent  
254 CRBN–protein interaction<sup>7,9,10</sup>. Because the corresponding residue in mouse and chicken  
255 Crbn is isoleucine (Supplementary Fig. 6c), we substituted the Ile to Val in both, to produce  
256 MmCrbn-I391V and GgCrbn-I390V. In our biochemical analysis, the binding ability of  
257 HsCRBN-V388I was dramatically decreased compared with that of the wild-type protein  
258 (Supplementary Fig. 7a). Although MmCrbn did not bind with either protein in the presence  
259 of thalidomide (middle panel), interestingly, wild-type GgCrbn bound to GgPlzf following  
260 thalidomide treatment (right panel), whereas GgSall4 did not bind to GgCrbn with  
261 thalidomide. Both MmCrbn-I391V and GgCrbn-I390V indicated highly thalidomide-  
262 dependent binding with both Sall4 and Plzf.

263 In Supplementary Fig. 7a, thalidomide induced GgCrbn–GgPlzf interaction although it  
264 did not provide an interaction between MmCrbn and MmPlzf. To investigate this reason, we  
265 compared amino acid sequences of a thalidomide-binding region among human, mouse and  
266 chicken (Supplementary Fig. 6c). As a result, Glu377 in HsCRBN was conserved in GgCrbn  
267 but the Glu in MmCrbn was substituted to Val. Actually, it was reported that Glu377 in  
268 HsCRBN was an important amino acid for interaction between CRBN and GSPT1<sup>8</sup>.



269 Therefore, we investigated whether the Glu377 is important for the interaction between  
270 CRBN and PLZF or SALL4. In vitro binding assay showed that substitution of the Glu to  
271 Val in HsCRBN significantly decreased binding ability to both SALL4 and PLZF  
272 (Supplementary Fig. 7b). In MmCrbn, double substitution of the Val380 to Glu and the Ile391  
273 to Val significantly increased binding ability to Sall4 and Plzf, although single substitution  
274 of the Val to Glu did not significantly increased (Supplementary Fig. 7c).

275 Next, each protein pair was transiently expressed in CRBN-deficient HEK293T cells.  
276 In the mouse pair, wild-type MmCrbn did not degrade either MmPlzf or MmSall4, whereas  
277 the MmCrbn-I391V and MmCrbn-V380E/I391V mutants degraded both (Fig. 5a and b,  
278 respectively). In the chicken pair, wild-type GgCrbn significantly induced thalidomide-  
279 dependent degradation of GgPlzf (Fig. 5c), while degradation of GgSall4 was almost never  
280 observed (Fig. 5d). GgCrbn-I390V also degraded GgPlzf and GgSall4 with thalidomide (Fig.  
281 5c and d, respectively). In contrast, the GgCrbn-E379V mutant did not induce degradation of  
282 GgPlzf (Supplementary Fig. 7d).

283 Taken together, we concluded that the Glu in thalidomide-binding region of CRBN is  
284 an important amino acid for thalidomide-dependent interaction with PLZF and SALL4, and  
285 that conservative amino acid sequence of CRBN-binding region with thalidomide in  
286 substrate proteins was also required, like wild-type GgCrbn could not induce degradation of  
287 GgSall4. In addition, these results suggest that thalidomide-dependent PLZF degradation  
288 occurs in many animals, including chickens and humans, while in contrast, SALL4  
289 degradation by thalidomide may occur in a limited number of animals, including rabbits<sup>10</sup>,  
290 humans, and monkeys.

291           Recently, humanized-CYP3A mice were reported to show abnormal limb development  
292 after treatment with thalidomide<sup>25</sup>, suggesting that the thalidomide metabolites induce  
293 teratogenesis. We therefore investigated the function of 5-hydroxythalidomide on mouse and  
294 chicken Crbn-dependent degradation. Surprisingly, 5-hydroxythalidomide induced Crbn-  
295 dependent degradation of both Plzf (Fig. 5e and g) and Sall4 (Fig. 5f and h), whereas  
296 thalidomide had no function in MmCrbn and GgSall4 degradation by GgCrbn. Furthermore,  
297 thalidomide and 5-hydroxythalidomide did not induce downregulation of *PLZF* and *SALL4*  
298 mRNA expression in HuH7 cells (Supplementary Fig. 8). These results suggest that 5-  
299 hydroxythalidomide, rather than thalidomide, has a high potential for degradation of both  
300 Plzf and Sall4 in many animals.

301

### 302 **Plzf plays important roles in chicken limb development.**

303           It has been reported that both PLZF protein and *Plzf* mRNA are expressed in the limb  
304 buds of mouse and rat embryos<sup>14,33</sup>, suggesting direct function of Cbrn-thalidomide on PLZF  
305 in the developing limb bud. We thus investigated whether PLZF plays important roles in the  
306 development of chick limb bud. We first examined expression of *Plzf* gene in the chick limb  
307 bud and confirmed *Plzf* mRNA expression by whole mount *in situ* hybridization (Fig. 6a).  
308 Expression of *Sall4* and *Crbn* genes was also observed in the same region (Fig.6a).  
309 Expression of *Plzf* as well as *Sall4* mRNA was confirmed to be in limb mesenchyme by  
310 section *in situ* hybridization (Supplementary Fig. 9a). Then, to investigate whether  
311 downregulation of *Plzf* mRNA induces limb teratogenicity in chicken embryos, we  
312 constructed shRNA expression vector of GgPlzf. Immunoblot analysis showed that the  
313 constructed shRNA vector downregulated protein expression of overexpressed GgPlzf in DF-

314 1 cells, which is chicken culture cells (Fig. 6b). Next, to elucidate developmental role of Plzf  
315 in chick limb development, RCAN retrovirus, which express shRNA (#2) against chick Plzf,  
316 was infected into blastoderm cells containing prospective lateral plate mesoderm cells that  
317 gives rise to the limb bud. As shown Fig. 6c, it was confirmed that Plzf protein expression  
318 level was downregulated in the chicken embryos treated with Plzf shRNA by immunoblot  
319 analysis. In Fig. 6d, interestingly, Plzf shRNA infected limb bud showed several types of  
320 malformations (28%, n=32). Forelimb and hindlimb were shortened compared to control  
321 shRNA (GFP shRNA), infected limb bud (0%, n=10). We also observed that only one bone  
322 was formed in the zeugopod and digit number was also reduced in Plzf shRNA infected limb  
323 bud. These results suggest that chick Plzf has a pivotal role for limb bud outgrowth and that  
324 downregulation of Plzf causes teratogenicity.

325

### 326 **Thalidomide reduces Plzf protein levels in abnormal limb buds of chickens.**

327 Next, we investigated whether thalidomide targets PLZF in the chick limb bud. In  
328 previous reports, decreased expression of the *fgf8* gene is an indicator of abnormal limb bud  
329 development following thalidomide treatment<sup>4</sup>, and we confirmed reduced/skewed pattern of  
330 *fgf8* in truncated limb buds after thalidomide treatment (Supplementary Fig. 10a). In  
331 addition, limb skeletal defects were observed in this condition (Supplementary Fig. 10b). We  
332 investigated whether the amount of Plzf protein changes in these abnormal limb buds.  
333 Interestingly, reduced Plzf protein levels were observed in abnormal limb buds, although  
334 immunostaining of the Sall4 protein showed no change (Fig. 7a). Furthermore, to confirm  
335 the protein levels of Plzf and Sall4 in them, chick limb buds after thalidomide treatment were  
336 collected and characterized. Immunoblotting analysis also indicated that a reduction in Plzf

337 was predominantly observed in teratogenic limb buds (T3, T8, and T18 in Fig. 7b and c).  
338 Taken together with the limb defects induced by human and mouse *Plzf* deficiency<sup>15,16</sup>, these  
339 results suggest that PLZF is a pivotal molecule for teratogenesis in chicken. Furthermore, we  
340 investigated whether 5-hydroxythalidomide induces teratogenicity in chicken embryo. As  
341 showed in Fig. 7d, 5-hydroxythalidomide also induced teratogenicity, and immunoblot  
342 analysis indicated that 5-hydroxythalidomide more strongly induced degradation of *Plzf* and  
343 *Sall4*, compared to thalidomide (Fig. 7e). These results suggest that 5-hydroxythalidomide  
344 plays an important role in thalidomide teratogenicity. The phenotypes of chicken embryos  
345 provided between 5-hydroxythalidomide and thalidomide were very similar (Fig. 7d),  
346 suggesting that degradation of other proteins including *Sall4* is required much more to  
347 provide severe teratogenicity.

348

## 349 **Discussion**

350 Many research groups have attempted to identify thalidomide-dependent substrates of  
351 CRBN<sup>5-7,9,10,32</sup>. The methodologies they have used have largely been based on cell-based  
352 assays such as SILAC (stable isotope labelling by amino acids in cell culture) and transient  
353 expression systems. In this study, we have used a biochemical assay using cell-free HuTFPA  
354 and AlphaScreen technologies. This method could easily detect thalidomide-dependent  
355 interactions between CRBN and PLZF, SALL4, or IKZF1, without the need for protein  
356 purification (Fig. 1), as well as the variations in the biochemical response of CRBN–protein  
357 depending on the presence of thalidomide, its derivatives, or 5-hydroxythalidomide (Fig. 3  
358 to 5). Thalidomide-dependent interaction between CRBN and PLZF related to two ZNF  
359 domains (Fig. 3) and slowness of IMiD-dependent protein degradation, suggesting that the

360 interaction manner is more complicated manner and may be different from known substrates,  
361 such as IKZF1, IKZF3, and SALL4. These results support a reason that PLZF has not been  
362 identified by method using cell-based assay or *in silico* so far, suggesting that our new  
363 biochemical approach using protein array could be useful in the identification. However, our  
364 assay system cannot identify substrate which requires the interaction with CRBN in protein  
365 complex. Therefore, our cell-free and conventional cell-based assay are complementary  
366 relationship each other, and we believe that the cell-free method can be used in the future  
367 research for exploration and confirmation of substrates with the cell-based assay.  
368 Furthermore, as IKZF1 interacted with CRBN in the presence of thalidomide but not 5-  
369 hydroxythalidomide, this method would be used for analysis of compound-dependent protein-  
370 protein interaction in development of novel drugs including thalidomide derivatives.

371 In this study, we identified PLZF as a new target of the thalidomide–CRBN system. In  
372 chicken embryo, downregulation of *Plzf* showed hypoplasia of limb bud (Fig. 6d and e),  
373 indicating that *Plzf* is required for proper chicken limb development. Furthermore,  
374 thalidomide and 5-hydroxythalidomide treatments decreased *Plzf* protein level but *Sall4* was  
375 not induced protein degradation in the abnormal limb buds of chicken embryos (Fig. 7).  
376 According to these findings, we made a model for teratogenesis of chick limb buds (Fig. 8a).  
377 In mouse studies, *Plzf*<sup>-/-</sup> deficient mice had major musculoskeletal limb defects<sup>14</sup>, and it was  
378 reported that PLZF deficient caused alteration of *Hoxds* or *Bmps* expression in developing  
379 limb<sup>14</sup>. Because *Bmp* proteins function as regulators in programming cell death and *Plzf*/*Gli3*  
380 deficient induced cell death<sup>15</sup>, suggesting that degradation of PLZF by thalidomide treatment  
381 may affect cell proliferation in limb development. In contrast, *Sall4* conditional knockout  
382 mice (*Sall4*-CKO) driven by T-Cre, which express early mesoderm, did not show any  
383 phenotype in the forelimb<sup>12</sup>. Furthermore, only 5% of *Plzf*<sup>-/-</sup> mice showed forelimb phenotype

384 which shows autopod abnormality<sup>14</sup>. These results indicate that thalidomide-induced  
385 teratogenicity in human cannot be explained by the results of each single knockout mice of  
386 *Sall4* or *Plzf*. In previous report, *Plzf* and *Gli3* double knockout mice showed phenotypes of  
387 remarkably reduction of stylopod and zeugopod<sup>15</sup>, and these phenotypes similar to  
388 phocomelia that is a typical phenotype of thalidomide embryopathy. It was reported that *Gli3*  
389 expression was reduced in *Sall4*-CKO mice, therefore, we expect that double knockout mice  
390 of *Sall4*; T-Cre; *Plzf*<sup>-/-</sup> would explain thalidomide phenotype in human patients. Our chick  
391 results showed that PLZF would be the pivotal target of thalidomide. Given that *Sall4* protein  
392 was not degraded by thalidomide treatment in the chick embryo, it is thought that PLZF has  
393 more crucial function for normal development of the limb than *Plzf* in the mouse. Thus,  
394 variation of the protein sensitivity to the thalidomide and/or difference of the genes that are  
395 necessary for normal development of the limb between species would bring about difference  
396 of the phenotype between species in thalidomide teratology, which we showed in this study.  
397 PLZF that we found in this study as a new target of thalidomide will be a crucial target to  
398 solve thalidomide mystery between species in future.

399 PLZF is expressed in many cell types<sup>34</sup>, and is a multifunctional TF modulating many  
400 developmental biological processes<sup>13</sup> including cellular proliferation and cell cycle control,  
401 myeloid and lymphoid cell development and differentiation, programming of NKT and iNKT  
402 cells, spermatogenesis and spermatogonial stem cell renewal, haematopoiesis,  
403 musculoskeletal-limb development, megakaryocytic development, and cytokine production.  
404 Notably, PLZF functions as a regulator for many immunoresponses<sup>35-38</sup>. Thalidomide is an  
405 immunomodulatory imide drug, and IKZF1 and IKZF3 are thought to be key targets of  
406 immunomodulation by thalidomide and its derivatives<sup>39,40</sup>. Therefore, dysfunction of PLZF

407 by thalidomide may also result from its function as an IMiD, though further analysis will be  
408 required to confirm this.

409 Human CYP2C and 3A produce two metabolites: 5-hydroxythalidomide and 5'-  
410 hydroxythalidomide, as primary metabolites of thalidomide<sup>18-20</sup>. 5'-hydroxythalidomide has  
411 no effect on teratogenesis in chicken embryos<sup>23</sup>. However, it was no evidence whether  
412 metabolites from thalidomide induce CRBN-dependent protein degradation. In this study, 5-  
413 hydroxythalidomide induced degradation of both human PLZF and SALL4 proteins at the  
414 same level as thalidomide (Fig. 4). It is known that humans are highly sensitive to  
415 thalidomide<sup>3,41</sup>. These reports and our results suggest that 5-hydroxythalidomide has the  
416 potential for teratogenesis. For this reason, we used our findings to develop the hypothesis  
417 that the double degradations of PLZF and SALL4 by both thalidomide and 5-  
418 hydroxythalidomide produce high sensitivity to thalidomide in human embryopathy (Fig. 8b).  
419 We are convinced that researching the generation and action of 5-hydroxythalidomide will  
420 be important for understanding the function of thalidomide.

421 Thalidomide is a typical drug which shows species specificity<sup>3</sup>. From several  
422 researches, the species specificity of thalidomide has been thought to be provide by the  
423 difference of a thalidomide-binding sequence in CRBN<sup>7,9,10</sup>. Consistent with these reports, in  
424 this study, humanized-mouse and chicken Crbns indicated thalidomide-dependently  
425 interactions and degradation of both Plzf and Sall4 proteins (Fig. 5a-d and Supplementary  
426 Fig. 7). In addition, with the sequence difference in Crbn, it has been thought that the  
427 metabolism cascade of thalidomide is also important in the species specificity<sup>3</sup>. In this study,  
428 5-hydroxythalidomide showed higher potential than thalidomide for degradations of both  
429 Plzf and Sall4 proteins from mouse and chicken (Fig. 5e-h, Fig. 7d and e). Furthermore,

430 humanized-CYP3A mice have been recently shown to undergo abnormal limb development  
431 at a high rate (>40%) after thalidomide treatment<sup>25</sup>, although in general thalidomide does not  
432 produce teratogenesis in mice<sup>3</sup>. These reports and our results suggest that thalidomide  
433 metabolism cascade, including metabolism speed and kinds of metabolites, plays an  
434 important role in the species specificity of thalidomide.



## 435 **Methods**

436

437 **Reagents.** Thalidomide (Sigma-Aldrich and Tokyo Chemical Industry Co., Ltd),  
438 Pomalidomide (Sigma-Aldrich), Lenalidomide (FUJIFILM Wako Pure Chemical), 5-  
439 hydroxythalidomide (5-hydroxythalidomide was prepared according to a previously  
440 published method<sup>20</sup>), MG132 (Peptide Institute), and MLN4924 (Chemscene) were dissolved  
441 in DMSO (FUJIFILM Wako Pure Chemical) at 2 to 100 mM and stored at -20°C as stock  
442 solutions. All drugs were diluted 1,000, 500, or 250-fold for *in vivo* experiments, or diluted  
443 200-fold for *in vitro* experiments.

444

445 **Production of recombinant proteins using the cell-free system.** *In vitro* transcription and  
446 wheat cell-free protein synthesis were performed using a WEPRO1240 expression kit (Cell-  
447 Free Sciences). Transcripts were conducted using SP6 RNA polymerase with plasmids or  
448 DNA fragments as templates. The translation reaction was performed in bilayer mode using  
449 a WEPRO1240 expression kit (Cell-Free Sciences), according to the manufacturer's  
450 instructions. For biotin labelling, 1 µl of cell-free synthesized crude biotin ligase (BirA),  
451 produced by the wheat cell-free expression system, was added to the lower layer, and 0.5 µM  
452 (final concentration) of d-biotin (Nacalai Tesque) was added to both the upper and lower  
453 layers, as described previously<sup>42</sup>.

454

455 **Interaction analysis of CRBN-IMiD-substrate using AlphaScreen technology.** IMiD at  
456 the concentrations indicated in each figure and 0.5 µl of biotinylated HsCRBN, MmCrbn, or  
457 GgCrbn were mixed in a 15 µl of AlphaScreen buffer containing 100 mM Tris (pH 8.0),  
458 0.01% Tween20, 100 mM NaCl, and 1 mg/ml BSA. Then, 5 µl of substrate mixture  
459 containing 0.8 µl of FLAG-GST-substrate in AlphaScreen buffer was added, and 20 µl of the  
460 reaction mixture was incubated at 26°C for 1 h in a 384-well AlphaPlate (PerkinElmer).  
461 Subsequently, 5 µl of detection mixture containing 0.2 µg/ml anti-DYKDDDDK mouse mAb  
462 (Wako), 0.08 µl of streptavidin-coated donor beads, and 0.08 µl of Protein A-coated acceptor  
463 beads (PerkinElmer) in AlphaScreen buffer, were added to each well. After incubation at  
464 26°C for 1 h, luminescent signals were detected using an EnVision plate reader  
465 (PerkinElmer).

466

467 **Production of the human transcription factor protein array (HuTFPA).** For the  
468 construction of human TF protein array, we prepared pEU-E01-FLAG-GST-K1-02 vector  
469 containing FLAG tag, GST tag, SG linker, and *AsiSI* restriction enzyme site at 5' upstream  
470 of multiple cloning site. cDNA clones coding proteins with DNA-binding domains were  
471 selected from cDNA resources collected by Kazusa DNA research institute<sup>43</sup> (Supplementary  
472 Table 1). The plasmid of each clone was digested by combination of *AsiSI* and an appropriate  
473 restriction enzyme such as *XhoI*, *SalI* or *NotI*. The DNA fragment was inserted into pEU-  
474 E01-FLAG-GST-K1-02 vector digested by same restriction enzymes. After subcloning, pEU  
475 expression plasmids were arranged in 96 well format and stored as glycerol stock.  
476 Transcription template DNA fragments were amplified directly by PCR using PrimeStar Max  
477 PCR polymerase (Takara Bio), SPu-2 (5'-CAGTAAGCCAGATGCTACAC) and  
478 AODA2306 (5'-AGCGTCAGACCCCGTAGAAA) primers and diluted glycerol stocks as  
479 template. Transcription and translation reactions were conducted using WEPRO7240  
480 expression kit (Cell-Free Sciences) in micro-titer plate format. Transcription reaction mixture  
481 was prepared by mixing 1.4  $\mu$ l of transcription buffer LM, 0.7  $\mu$ l of NTP mixture (25 mM  
482 each), 0.07  $\mu$ l RNase Inhibitor (Promega), 0.26  $\mu$ l SP6 polymerase (Promega) and 1.4  $\mu$ l  
483 PCR product in 96 well plate. The transcription reaction was incubated at 37°C for 18 h.  
484 Translation reaction mixture containing 2.5  $\mu$ l of mRNA, 1.67  $\mu$ l of WEPRO 7240 wheat  
485 germ extract, 0.14  $\mu$ l of creatine kinase (20 mg/ml) (Roche diagnostics) and 0.11  $\mu$ l RNase  
486 Inhibitor was prepared and overlaid with 44  $\mu$ l of SUB-AMIX SGC solution (Cell-Free  
487 Sciences) in V-bottom 384 well plate. The translation reaction was incubated at 26°C for 18  
488 h. Expression of each protein product was confirmed by Western blotting using anti-  
489 DYKDDDDK tag antibody (FUJIFILM Wako Pure Chemical).

490  
491 **High-throughput screening using AlphaScreen technology.** We added 20  $\mu$ l of bait  
492 mixture, containing 50  $\mu$ M thalidomide and 0.5  $\mu$ l of biotinylated HsCRBN in AlphaScreen  
493 buffer, to 384-well AlphaPlates using a FlexDrop Precision Reagent Dispenser  
494 (PerkinElmer). We next added 0.8  $\mu$ l of FLAG-GST-transcription factor proteins to 384-well  
495 AlphaPlates using a NanoHead (PerkinElmer) and a Janus Workstation (PerkinElmer). After  
496 the 384-well AlphaPlates were incubated at 26°C for 1 h, 5  $\mu$ l of detection mixture containing  
497 0.2  $\mu$ g/ml anti-DYKDDDDK mouse mAb (FUJIFILM Wako Pure Chemical), 0.08  $\mu$ l of  
498 streptavidin-coated donor beads, and 0.08  $\mu$ l of Protein A-coated acceptor beads  
499 (PerkinElmer) in AlphaScreen buffer, were added to each well using a FlexDrop precision

500 reagent dispenser. After incubation at 26°C for 1 h, luminescent signals were detected using  
501 an EnVision plate reader (PerkinElmer).

502

503 **Plasmids.** Plasmids pDONR221 and pcDNA3.1(+), based on Gateway technology, were  
504 purchased from Invitrogen, and the pEU vector for the wheat cell-free system was  
505 constructed in our laboratory, as previously described<sup>26</sup>. Plasmids pcDNA3.1(+)-FLAG-GW,  
506 pcDNA3.1(+)-FLAG-MCS, pcDNA3.1(+)-AGIA-MCS, pEU-bls-GW, and pEU-bls-MCS  
507 were constructed based on each original vector by PCR and using the In-Fusion system  
508 (Takara Bio), or PCR and restriction enzymes. pEU-FLAG-GST-IKZF1, -SALL4, -PLZF, -  
509 SALL1, -SALL2, -ZBTB17, -ZBTB20, -ZBTB38, -ZBTB48, -HNRNPK, -HMGB2, and  
510 ELF5 were purchased from the Kazusa DNA Research Institute. Plasmids HsSALL4,  
511 HsPLZF, and IKZF1 were amplified and restriction enzyme sites were added by PCR and  
512 cloned into pcDNA3.1(+)-AGIA-MCS. The open reading frame of HsCRBN was purchased  
513 from the Mammalian Gene Collection (MGC) and MmCrbn, MmSall4, and MmPlzf were  
514 did from Functional Annotation of Mouse (FAMTOM), respectively<sup>28,31</sup>. The open reading  
515 frame of GgCrbn was artificially synthesized by IDT, and pcDNA3.1(+)-GgSall4-  
516 DYKDDDDK and pcDNA3.1(+)-GgPlzf-DYKDDDDK were purchased from GenScript.  
517 HsCRBN was amplified and the BP reaction sequence (attB and attP) was added by PCR and  
518 cloned into pDONR221 using BP recombination (Invitrogen). Then, pDONR221-HsCRBN  
519 was recombined to pEU-bls-GW or pcDNA3.1(+)-FLAG-GW using LR recombination (attL  
520 and attR). MmCrbn and GgCrbn were amplified and restriction enzyme sites were added by  
521 PCR and cloned into pEU-bls-MCS or pcDNA3.1(+)-FLAG-MCS. MmSall4, GgSall4,  
522 MmPlzf, and GgPlzf were amplified and restriction enzyme sites were added by PCR and  
523 cloned into pEU-FLAG-GST-MCS or pcDNA3.1(+)-AGIA-MCS. Domain swapped  
524 HsPLZF was constructed by inverse PCR and the In-Fusion system (Takara Bio). Deletion  
525 mutation and amino acid mutation of each protein was performed by inverse PCR.

526 For *in situ* hybridization, the cDNAs for chicken *Fgf8*, *Crbn*, *Sall4*, and *Plzf* were obtained  
527 by PCR using the following primers: *Fgf8* (NM\_001012767.1), 5'-  
528 attacgcgtATGGACCCCTGCTCCTCGCTCTTCA-3' and 5'-  
529 attgataTCATGGGCGCAGGGAGGCGCTGGAG-3'; *Crbn* (XM\_015293204.2), 5'-  
530 ctataggctagaattcacgcgtATGGCCGCCGAGGAGGGAGGTGACGGA-3' and 5'-  
531 cactaaaggggaagcggccgcgatatcTTACAAGCAGAGTAACGGAGATC-3'; *Sall4*  
532 (NM\_001080872.1), 5'-

533 ctataggctagaattcacgcgtATGTCGCGACGGAAGCAGGCGAAGCCC-3' and 5'-  
534 cactaaaggggaagcggccgcgatacTTAACTAACGGCAATTTTGTTCT-3'; *Plzf*  
535 (XM\_015298212.1), 5'-  
536 ctataggctagaattcacgcgtATGGATTTGACTAAGATGGGCATGATA-3' and 5'-  
537 cactaaaggggaagcggccgcgataTCAGACGTAGCAGAGGTAGAGATAG-3'. The amplified  
538 fragments of *Fgf8* were digested by MluI-EcoRV, and subcloned into pCMS-EGFP vector  
539 (Clontech). The amplified fragments of *Crbn*, *Sall4*, and *Plzf* were inserted into MluI-EcoRV  
540 site of pCMS-EGFP vector by In-fusion (Takara Bio).

541 For knockdown of chick *Plzf*, the shRNA sequences of chick *Plzf* (#1: 5'-  
542 GGAAATCGAGGTACATCAAGG-3' or #2: 5'-GATTACTCGGCCATGATCAAA-3')  
543 were used. The following DNA oligos: #1: 5'-  
544 gatcccGGAAATCGAGGTACATCAAGGgcttctgtcacCCTTGATGTACCTCGATTTCttt  
545 tta-3' and 5'-agcttaaaaaGGAAATCGAGGTACATCAAGGgtgacaggaagc  
546 CCTTGATGTACCTCGATTTCgg-3'; #2: 5'-  
547 gatcccGATTACTCGGCCATGATCAAAgcttctgtcacTTTGATCATGGCCGAGTAATCttt  
548 tta-3' and 5'-agcttaaaaaGATTACTCGGCCATGATCAAAgtgacaggaagc  
549 TTTGATCATGGCCGAGTAATgg-3' were purchased from Invitrogen. The DNA oligo  
550 pairs were annealed and inserted into pEntryCla12-chickU6 shuttle vector using  
551 BamHI/HindIII site.

552

553 **Cell culture and transfection.** HEK293T cells were cultured in DMEM (low glucose)  
554 medium (FUJIFILM Wako Pure Chemical) supplemented with 10% fetal bovine serum  
555 (FUJIFILM Wako Pure Chemical), 100 unit/ml penicillin, and 100 µg/ml streptomycin  
556 (Gibco) at 37°C under 5% CO<sub>2</sub>. HEK293T cells were transfected using *TransIT-LT1*  
557 transfection reagent (Mirus Bio) or PEI Max: Polyethyleneimine “Max” (MW 40,000)  
558 (PolyScience, Inc.).

559 HuH7 cells were cultured in DMEM (high glucose) medium (FUJIFILM Wako Pure  
560 Chemical) supplemented with 10% fetal bovine serum (Wako), 100 unit/ml penicillin, 100  
561 µg/ml streptomycin (Gibco), 1 mM Sodium Pyruvate (Gibco), 10 mM HEPES (Gibco), and  
562 1× MEM NEAA (Gibco) at 37°C under 5% CO<sub>2</sub>.

563 THP-1 cells were cultured in RPMI160 GlutaMAX medium (Gibco) supplemented with  
564 10% fetal bovine serum (FUJIFILM Wako Pure Chemical), 100 unit/ml penicillin, and 100  
565 µg/ml streptomycin (Gibco) at 37°C under 5% CO<sub>2</sub>.

566 TK, HT, BJAB, SU-DHL-4, MT-4, Raji cells were cultured in RPMI1640 GlutaMAX  
567 medium supplemented with 10% fetal bovine serum (FUJIFILM Wako Pure Chemical), 100  
568 unit/ml penicillin, 100 µg/ml streptomycin (Gibco), and 55 µM 2-Mercaptoethanol (Gubco)  
569 at 37°C under 5% CO<sub>2</sub>.

570 DF-1 cells were cultured in DMEM (low glucose) medium (FUJIFILM Wako Pure  
571 Chemical) supplemented with 10% fetal bovine serum (Wako), 100 unit/ml penicillin, and  
572 100 µg/ml streptomycin (Gibco) at 37°C under 5% CO<sub>2</sub>. DF-1 cells were transfected using  
573 *TransIT-LT1* transfection reagent (Mirus Bio).

574

575 **Immunoblot and antibodies.** Protein lysates were separated by SDS-PAGE and transferred  
576 onto polyvinylidene difluoride membranes (Millipore). After the membranes were blocked  
577 using 5% skimmed milk (Megmilk Snow Brand) in TBST (20 mM Tris-HCl pH 7.5, 150  
578 mM NaCl, 0.05% Tween20) at room temperature for 1 h, the following antibodies were used.  
579 Anti-FLAG mouse mAb (HRP-conjugated, Sigma-Aldrich, A8592), anti-AGIA rabbit  
580 mAb<sup>31</sup> (HRP-conjugated, produced in our laboratory) were used to detect epitope-tagged  
581 proteins. Anti- $\alpha$ -tubulin rabbit pAb (HRP-conjugated, MBL, PM054-7) was used to detect  
582  $\alpha$ -tubulin. Biotinylated proteins were detected by anti-biotin (HRP-conjugated, Cell  
583 Signaling Technology, #7075). Anti-CRBN rabbit mAb (Cell Signaling Technology,  
584 #71810), anti-PLZF rabbit mAb (Cell Signaling Technology, #39784), anti-PLZF rabbit pAb  
585 (GeneTex, GTX111046), anti-SALL4 rabbit pAb (Abcam, ab29112), anti-SALL4 mouse  
586 mAb (Santa Cruz Biotechnology, sc-101147), anti-DDB1 mouse mAb (Santa Cruz  
587 Biotechnology, sc-376860), anti-CUL4 mouse mAb (Santa Cruz Biotechnology, sc-377188),  
588 anti-RBX1 mouse mAb (Santa Cruz Biotechnology, sc-393640), and anti-ubiquitin mouse  
589 mAb (P4D1, Cell Signaling Technology, #3936) were used as primary antibodies. Anti-  
590 rabbit IgG (HRP-conjugated, Cell Signaling Technology, # 7074) and anti-mouse IgG (HRP-  
591 conjugated, Cell Signaling Technology, # 7076) were used as secondary antibodies.  
592 Immobilon (Millipore) or ImmunoStar LD (FUJIFILM Wako Pure Chemical) was used as  
593 substrate HRP and luminescent signals were detected using an ImageQuant LAS 4000mini  
594 (GE Healthcare). To perform re-probing, Stripping Solution (FUJIFILM Wako Pure  
595 Chemical) was used and re-blocked using 5% slim milk in TBST.

596 For immunoblot analysis of extract from chicken embryo, a right forelimb bud was  
597 dissected from HH st. 22/23 embryos, and boiled in 50 µl of buffer (50 mM Tris-HCl pH 7.5,

598 4% SDS) at 98°C for 10 min. Protein concentration of each lysate was quantified using BCA  
599 assay (Thermo Fisher Scientific).

600

601 ***In vitro* pull-down assay of CRBN and substrate.** To confirm the thalidomide-dependent  
602 interactions between IKZF1, PLZF, or SALL4 and CRBN, we performed pull-down assays  
603 using Dynabeads M-280 Streptavidin (Invitrogen). Biotinylated CRBN-WT and CRBN-  
604 YW/AA were synthesized using the wheat cell-free system as described above. We then  
605 mixed 5 µl of Dynabeads M-280 Streptavidin with 5 µl of biotinylated CRBN-WT or CRBN-  
606 YW/AA and diluted this 10-fold with PBS containing 0.05% Tween20, and incubated this at  
607 room temperature for 1 h. The beads were washed three times in 500 µl PBS containing  
608 0.05% Tween20 and substrate-thalidomide mixture was added containing 10 µl of FLAG-  
609 GST-IKZF1, -SALL4 or -PLZF, and 200 µM thalidomide (0.5% DMSO) in 300 µl of  
610 AlphaScreen buffer containing 100 mM NaCl, 0.01% Tween20, and 1 mg/ml BSA. After  
611 rotation at room temperature for 90 min, the beads were washed four times in 500 µl of 1×  
612 Lysis buffer (50 mM Tris-HCl pH 7.5, 150 mM NaCl, 1% Triton X-100) and proteins were  
613 eluted by boiling in 1× sample buffer (62.5 mM Tris-HCl pH 6.8, 2% SDS, 10% glycerol)  
614 containing 5% 2-mercaptoethanol. The proteins were then analysed by immunoblot.

615

616 **Construction of CRBN-KO HEK293T cells.** The guide nucleotide sequence 5′–  
617 ACTCCGGGCGGTTACCAGGC- 3′ was selected from the human CRBN gene. The Guide-  
618 it plasmid vector (Takara Bio) was used to construct CRBN-KO cells. We then cultured  
619 HEK293T cells in a 6-well plate and transfected the plasmid into them. Two days after  
620 transfection, GFP positive cells were sorted by FACS Aria (Becton, Dickinson and Company)  
621 and cell clones were obtained by limiting dilution. Genomic DNA was then isolated and the  
622 mutation was confirmed by sequencing after TA cloning (Toyobo).

623

624 ***In vivo* IMiD-dependent degradation assay of substrates.** To confirm IMiD-dependent  
625 degradation of PLZF, HEK293T or HEK293T-CRBN<sup>-/-</sup> cells were cultured in 48-well plates  
626 and transfected with 200 ng pcDNA3.1(+)-FLAG-CRBN-WT or 200 ng pcDNA3.1(+)-  
627 FLAG-CRBN-YW/AA and 20 ng pcDNA3.1(+)-AGIA-PLZF or -AGIA-PLZF variants, or  
628 -AGIA-SALL4. After the cells were transfected for 8 h, they were treated with IMiD or  
629 DMSO (0.1%) in culture medium, at the times and concentrations indicated in each figure.



630 To show that IMiD-dependent PLZF degradation is caused by CRL and the 26S  
631 proteasome, the cells were treated with 2  $\mu$ M MLN4924 and 10  $\mu$ M MG132 (0.2% DMSO)  
632 at the times indicated in Fig. 2a.

633 To examine the degradation of endogenous PLZF or SALL4, we cultured HEK293T,  
634 HuH7, or THP-1 cells in 24 or 48-well plates and treated them with lenalidomide or DMSO  
635 (0.1%) in culture medium at the times and concentrations indicated in each figure.

636 To examine the degradation of endogenous PLZF in TK, HT, BJAB, SU-DHL-4, MT-4,  
637 Raji cells, we cultured induced the lymphoma cells in 12-well plate and treated then with  
638 lenalidomide, pomalidomide or DMSO (0.1%) in culture medium at the times and  
639 concentrations indicated in Supplementary Fig.5. Then, the cells were lysed with XXX  $\mu$ L  
640 of RIPA buffer containing a protease inhibitor cocktail (Sigma-Aldrich). Protein  
641 concentration of each lysate was quantified using BCA assay (Thermo Fisher Scientific).

642 To examine 5-hydroxythalidomide-dependent degradation of overexpressed PLZF,  
643 SALL4 or IKZF1, HEK293T-CRBN<sup>-/-</sup> cells were cultured in 48-well plates and transfected  
644 with 200 ng pcDNA3.1(+)-FLAG-CRBN-WT and 20 ng pcDNA3.1(+)-AGIA-SALL4, -  
645 PLZF, or -IKZF1. After the cells were transfected for 8 h, they were treated with thalidomide,  
646 5-hydroxythalidomide, or DMSO (0.1%) in culture medium at the indicated times and  
647 concentrations in Fig. 4c. For endogenous SALL4, PLZF, and IKZF1, HuH7 or THP-1 cells  
648 were cultured in 48-well plates and treated with thalidomide, 5-hydroxythalidomide, or  
649 DMSO (0.1%) in culture medium at the indicated times and concentrations in Fig. 4d and 4e.

650 To examine the species specificity of IMiD-dependent protein degradation, HEK293T-  
651 CRBN<sup>-/-</sup> cells were cultured in 48-well plates and transfected with 200 ng pcDNA3.1(+)-  
652 FLAG-(mouse or chicken) Crbn-WT or -IV and 20 ng pcDNA3.1(+)-AGIA-(mouse or  
653 chicken) Plzf or -(mouse or chicken) Sall4. After the cells were transfected for 8 h, they were  
654 treated with thalidomide or DMSO (0.2%) in culture medium for the times and  
655 concentrations indicated in Fig. 5a-d.

656 To examine whether 5-hydroxythalidomide induced the degradation of (mouse or  
657 chicken) Sall4 or Plzf, HEK293T-CRBN<sup>-/-</sup> cells were cultured in 48-well plates and  
658 transfected with 200 ng pcDNA3.1(+)-FLAG-(mouse or chicken) Crbn-WT and 20 ng  
659 pcDNA3.1(+)-AGIA-(mouse or chicken) Sall4 or -(mouse or chicken) Plzf. After the cells  
660 were transfected for 8 h, they were treated with thalidomide, 5-hydroxythalidomide or  
661 DMSO (0.2%) in culture medium for the times and concentrations indicated in Fig. 5e-h.

662 In all experiments, cells were lysed by boiling in 1× sample buffer containing 5% 2-  
663 mercaptoethanol, and the lysates were analysed by immunoblot.

664

665 **Quantitative RT-PCR.** To demonstrate PLZF protein level decrease results from post-  
666 translational event, *PLZF* mRNA expression in HEK293T, HuH7, or THP-1 cells treated  
667 with DMSO or lenalidomide for 24 h, were assessed by quantitative Real-Time PCR (qRT-  
668 PCR). To analyse *SALL4* or *PLZF* mRNA expression, HuH7 cells were treated with DMSO,  
669 thalidomide or 5-hydroxythalidomide for 24 h, were assessed by qRT-PCR. Total RNA was  
670 isolated from HEK293T, HuH7, or THP-1 cells treated with DMSO or lenalidomide for 24  
671 h using a SuperPrep cell lysis kit (Toyobo) and cDNA was synthesized using a SuperPrep  
672 RT kit (Toyobo), according to the manufacture's protocol. RT-PCR was performed using a  
673 KOD SYBR qPCR Mix (Toyobo) and data was normalized against GAPDH mRNA levels.  
674 PCR primers are as follows: *PLZF* FW 5'-GCACAGTTTTTCGAAGGAGGA-3', *PLZF* RV  
675 5'-GGCCATGTCAGTGCCAGT-3', *SALL4* FW 5'-GGTCCTCGAGCAGATCTTGT-3',  
676 *SALL4* RV 5'-GGCATCCAGAGACAGACCTT-3', *GAPDH* FW 5'-  
677 AGCAACAGGGTGGTGGAC-3', *GAPDH* RV 5'-GTGTGGTGGGGGACTGAG-3'

678

679 **Co-immunoprecipitation of CRL4<sup>CRBN</sup>-IMiD-PLZF.** To examine whether PLZF interacts  
680 with CRL4<sup>CRBN</sup>-thalidomide or -lenalidomide, HEK293T cells were cultured in a 15-cm dish  
681 and transfected with 12 µg pcDNA3.1(+)-FLAG-CRBN and 12 µg pcDNA3.1(+)-AGIA-  
682 PLZF. After HEK293T cells were treated with DMSO, 10 µM or 100 µM thalidomide or  
683 lenalidomide in the presence of 10 µM MG132 for 8 h, cells were lysed in 1.5 mL IP Lysis  
684 buffer (Pierce) (25 mM Tris-HCl pH 7.5, 150 mM NaCl, 1 mM EDTA, 1% NP-40, 5%  
685 glycerol) containing a protease inhibitor cocktail (Sigma-Aldrich) and incubated on ice for  
686 15 min. Lysates were clarified by centrifugation at 13,000 rpm for 15 min, and CRL<sup>CRBN</sup> was  
687 immunoprecipitated using anti-FLAG M2 magnetic beads (Sigma-Aldrich) with DMSO or  
688 10 µM or 100 µM thalidomide or lenalidomide in the presence of 10 µM MG132. After  
689 overnight rotation at 4°C, the beads were washed three times with 800 µL of IP Lysis buffer  
690 (Pierce) and the proteins were eluted with 1× sample buffer. After eluted proteins were  
691 transferred to another tube, 2-mercaptoethanol (final concentration is 5%) was added, and  
692 boiled at 98°C for 5 min. The proteins were then analysed by immunoblot.

693



694 ***In vivo* ubiquitination assay.** To detect polyubiquitination of PLZF in cells, HEK293T cells  
695 were cultured in a 10-cm dish and transfected with 5 µg pcDNA3.1(+)-FLAG-CRBN and 5  
696 µg pcDNA3.1(+)-AGIA-PLZF. After HEK293T cells were treated with DMSO, 10 µM or  
697 100 µM thalidomide or lenalidomide in the presence of 10 µM MG132 for 10 h, cells were  
698 lysed in 600 µl of SDS Lysis buffer (50 mM Tris-HCl pH 7.5, 1% SDS) containing a protease  
699 inhibitor cocktail (Sigma-Aldrich) and boiled at 90°C for 15 min. Denatured lysates were  
700 treated with Benzonase Nuclease (Sigma-Aldrich) at 37°C for 1 h, and the lysates were  
701 clarified by centrifugation at 13,000 rpm for 15 min, then diluted 10-fold with IP Lysis buffer  
702 (Pierce). The proteins were immunoprecipitated overnight with Dynabeads Protein G  
703 (Invitrogen) interacting anti-AGIA antibody at 4°C, which were then washed three times with  
704 800 µl of IP Lysis buffer (Pierce). Proteins were eluted by boiling in 1× sample buffer  
705 containing 5% 2-mercaptoethanol. The proteins were then analysed by immunoblot.

706  
707 ***In vitro* binding and ubiquitination assay.** To confirm that PLZF is a direct substrate, we  
708 performed an *in vitro* binding and ubiquitination assay as described previously<sup>6</sup>. HEK293T  
709 cells were cultured in a 15-cm dish and transfected with 28 µg pcDNA3.1(+)-FLAG-CRBN  
710 or empty vector. HEK293T cells were cultured in two 15-cm dishes and transfected with 25  
711 µg pcDNA3.1(+)-AGIA-PLZF per one dish. After 24 h, the cells were lysed in 1.6 ml/dish  
712 of IP Lysis buffer (Pierce) containing a protease inhibitor cocktail (Sigma-Aldrich), and 400  
713 µl of FLAG-CRBN or empty vector lysates were mixed with 400 µL of AGIA-PLZF lysates  
714 in the presence of DMSO or 100 µM lenalidomide. The FLAG-CRBN and AGIA-PLZF  
715 mixtures were immunoprecipitated using anti-FLAG M2 magnetic beads by rotating  
716 overnight at 4°C. As a negative control, empty vector and AGIA-PLZF mixtures were  
717 immunoprecipitated using anti-AGIA-conjugated magnetic beads (produced in our  
718 laboratory) by rotating overnight at 4°C. The beads were washed three times with 800 µl of  
719 IP Lysis buffer (Pierce) and washed twice with 600 µl of 1× ubiquitin reaction buffer (50  
720 mM Tris-HCl pH 7.5, 5 mM KCl, 5 mM MgCl<sub>2</sub>, 0.5 mM DTT), then resuspended in 20 µl  
721 of 1× ubiquitin reaction buffer containing 200 nM UBE1 E1 (R&D systems, U-110), 1 µM  
722 UbcH5a E2 (Enzo, BML-UW9050-100), 1 µM UbcH5b (Enzo, BML-UW9060-100), 5 mM  
723 ATP, 10 µM HA-ubiquitin (BostonBiochem, U-110), 10 µM MG132, protease inhibitor  
724 cocktail, and DMSO or 200 µM lenalidomide. Then, *in vitro* ubiquitination was performed  
725 at 30°C for 3 h, the proteins were denatured in 2% SDS by boiling at 95°C for 15 min. The  
726 proteins were diluted 20-fold with IP Lysis buffer (Pierce) and immunoprecipitated anti-

727 AGIA-conjugated magnetic beads (produced in our laboratory) at 4°C for 4 h. The beads  
728 were washed four times with 800 µl of IP Lysis buffer (Pierce) and the proteins were eluted  
729 with 750 µl (lane 1-4) or 20 µl (lane 5-6) of 1× sample buffer. After elution, proteins were  
730 transferred to another tube, 2-mercaptoethanol (final concentration is 5%) was added, and  
731 were boiled at 98°C for 5 min. The proteins were then analysed by immunoblot.

732

733 **Plzf knockdown experiment in DF-1 cells.** To confirm efficiency of shRNA, DF-1 cells  
734 were cultured in a 48-well plate and transfected with 50 ng pcDNA3.1(+)-AGIA-Ggplzf and  
735 400 ng shRNA vector. After 6 h, culture medium was exchanged with new culture medium  
736 and the DF-1 cells were harvested after 48 h of transfection. The lysates were denatured by  
737 boiling at 98°C for 5 min and analysed by immunoblot.

738

739 **Animals.** Fertilized eggs of white leghorn chicken (*Gallus gallus domesticus*) were  
740 purchased from a domestic poultry farm (Kakeien, Sendai, Japan). Eggs were incubated at  
741 38°C until appropriate developmental stage. Embryos were staged according to the criteria  
742 made by Hamburger and Hamilton<sup>44</sup>. All animal experiments were properly conducted in  
743 accordance with the guidelines of Tohoku University.

744

745 **Knockdown of Plzf in chicken embryos.** 5 µg of RCAN(A) retrovirus vector containing  
746 chick U6 promoter which expresses shRNA for *gfp* or *Plzf* was transfected into M/O chicken  
747 strain-derived embryonic fibroblast cells (CEF) cultured in 60-mm dish using Fugene HD  
748 transfection reagent (Promega). CEF was cultured in DMEM-high glucose containing 10%  
749 FBS, 2% chicken serum, 1% penicillin-streptomycin, and spread three times. After ten 10-  
750 cm dishes reached to the confluent, medium was changed into DMEM-high glucose  
751 containing 2% FBS and maintained for 24 hours. Then, supernatant was harvested and  
752 centrifuged at 100,000g for 3 hours at 4°C to concentrate retrovirus virion. Isolated virus  
753 virion was stored at -80°C. To infect retrovirus into the chick embryo, virus virion was  
754 sprinkled on the blastoderm cells at St. 8 M/O chick embryo and incubated for 5 days.  
755 Fertilized M/O chicken eggs were provided from the National BioResource Project (NBRP)  
756 “Chicken/Quail” in Nagoya University.

757

758 **Thalidomide treatment with chicken embryos.** A solid crystal of thalidomide (Tokyo  
759 Chemical Industry Co., Ltd) was resolved in 45% 2-hydroxypropyl-beta-cyclodextrin (HBC,

760 FUJIFILM Wako Pure Chemical) for 1-2 h at 60°C to make 2 µg/µl thalidomide or 5-  
761 hydroxythalidomide stock solution. This stock was mixed with same volume of 2× Hanks  
762 buffer as a working solution (1 µg/µl). To apply thalidomide to an embryo, a small hole was  
763 opened at amnion above a right forelimb bud at Hamburger and Hamilton (HH) st. 18, and  
764 working solution was injected in a space between amnion and a right forelimb bud. In the  
765 case of samples for *in situ* hybridization, immunofluorescence, and immunoblot analysis,  
766 embryos were treated by 30 µl of working solution, and incubated until HH st. 22/23. In the  
767 case of samples of skeletal pattern analysis, embryos were treated by 10 µl of working  
768 solution 3 times totally every 12 h for reducing lethality, and they were incubated until  
769 approximately HH st. 36 (embryonic day 10).

770

771 ***In situ* hybridization.** Embryos for whole-mount *in situ* hybridization and fluorescent *in situ*  
772 hybridization in sections (FISH) were fixed by 4% paraformaldehyde (PFA)/phosphate  
773 buffered saline (PBS) at 4°C for 12 h. Digoxigenin (DIG)-labeled RNA probes were prepared  
774 according to the manufacturer's instructions (Roche). Whole-mount *in situ* hybridization was  
775 performed as previously described<sup>45</sup>. In FISH, 10 µm thick-frozen sections were prepared  
776 with cryostat (LEICA CM3050S). FISH protocol was described previously<sup>46</sup>, with additional  
777 processes in order to amplify fluorescent signal. Additional processes are as follows. After  
778 the reaction between DIG-labeled RNA and anti-DIG antibody conjugated horseradish  
779 peroxidase (HRP) (Roche), sections were washed 3 times by TNT buffer (100 mM Tris-HCl,  
780 pH7.5, 150 mM NaCl, 0.05% Tween20), and were treated with DIG amplification working  
781 solution in TSA plus DIG Kit (PerkinElmer) for 5 minutes at room temperature (RT) in  
782 accordance with manufacturer's instructions (PerkinElmer). After 3 times wash by TNT,  
783 samples were treated by anti-DIG antibody conjugated HRP at 4°C for 12 h again.

784

785 **Immunofluorescence staining.** Chicken embryos for Immunofluorescence staining were  
786 fixed by 4% PFA/PBS at 4°C for 12 h. 10µm thick-frozen sections were prepared with  
787 cryostat. PLZF immunofluorescence staining was performed in accordance with Saito et al.<sup>47</sup>,  
788 using anti-PLZF rabbit pAb (1:250; GeneTex, GTX111046) as primary antibodies, and anti-  
789 rabbit conjugated HRP (1:500; GE Healthcare) as secondary antibodies. To detect fluorescent  
790 signals, we used the TSA Plus Fluorescent System (PerkinElmer) for 5 min at room  
791 temperature. The sections were stained with DAPI (Wako Pure Chemical Corporation) and  
792 finally sealed by FluorSave (Calbiochem).

793 SALL4 was detected as follows. After pre-blocking with blocking solution (1% blocking  
794 reagent in TNT) for 1 h at RT, the sections were incubated at 4°C overnight using an anti-  
795 SALL4 rabbit pAb (1:250; Abcam, ab29112). After three washes in TNT, the specimens  
796 were reacted with anti-rabbit IgG-Alexa Fluor 488-conjugated antibody (donkey, Invitrogen)  
797 diluted 1:500 with blocking solution for 1 h at RT, followed by washing three times in TNT.  
798 The sections were stained with DAPI and sealed with FluorSave reagent.

799

800 **Limb skeletal staining.** Embryos for skeletal staining (alcian or Victoria blue staining) were  
801 fixed by 10% formalin/tyrode. Alcian blue staining protocol was described previously<sup>48</sup>.  
802 Embryos were harvested in PBS and fixed in 10% formalin solution overnight. Fixed  
803 embryos were washed with 3%HCl/70%EtOH solution for 3 times and stained in 1% Victoria  
804 blue B (Sigma) dissolved in 3%HCl/70%EtOH overnight. Embryos were washed with  
805 3%HCl/70%EtOH solution overnight, then they were treated in methylsalicylate for  
806 transparent process.

807

808 **Imaging.** Images of FISH and immunofluorescence staining on sections were obtained using  
809 a TCS SP5 confocal microscope (LEICA). Images of whole-mount *in situ* hybridization were  
810 obtained using a fluorescent stereo microscope (LEICA M165FC with Olympus DP74  
811 camera). Images of skeletal staining were obtained using a stereo microscope (Olympus  
812 SZX16 with Olympus DP21 camera).

813

814 **Statistical analysis.** Significant changes were analysed by a one-way or two-way ANOVA  
815 followed Tukey's post-hoc test using Graph Pad Prism 8 software (GraphPad, Inc.). For all  
816 tests, a *P* value of less than 0.05 was considered statistically significant.

817

818 **Data availability.** The authors declare that all data supporting the findings of this study are  
819 available in the manuscript and its supplementary files or are available from the  
820 corresponding author upon reasonable request.

821

## 822 **References**

- 823 1. Miller, M. T. & Strömberg, K. Teratogen update: thalidomide: a review, with a focus on  
824 ocular findings and new potential uses. *Teratology* **60**, 306–321 (1999).
- 825 2. Smithells, R. W. & Newman, C. G. Recognition of thalidomide defects. *J. Med. Genet.*  
826 **29**, 716–723 (1992).
- 827 3. Vargesson, N. Thalidomide embryopathy: an enigmatic challenge. *ISRN Dev Biol.* **2013**,  
828 1-18 (2013).
- 829 4. Ito, T. *et al.* Identification of a primary target of thalidomide teratogenicity. *Science* **327**,  
830 1345–1350 (2010).
- 831 5. Krönke, J. *et al.* Lenalidomide causes selective degradation of IKZF1 and IKZF3 in  
832 multiple myeloma cells. *Science* **343**, 301–305 (2014).
- 833 6. Lu, G. *et al.* The myeloma drug lenalidomide promotes the cereblon-dependent  
834 destruction of Ikaros proteins. *Science* **343**, 305–309 (2014).
- 835 7. Krönke, J. *et al.* Lenalidomide induces ubiquitination and degradation of CK1 $\alpha$  in  
836 del(5q) MDS. *Nature* **523**, 183–188 (2015).
- 837 8. Matyskiela, M. E. *et al.* A novel cereblon modulator recruits GSPT1 to the  
838 CRL4(CRBN) ubiquitin ligase. *Nature* **535**, 252–257 (2016).
- 839 9. Donovan, K. A. *et al.* Thalidomide promotes degradation of SALL4, a transcription  
840 factor implicated in Duane Radial syndrome. *eLife* **7**, e38430 (2018).
- 841 10. Matyskiela, M. E. *et al.* SALL4 mediates teratogenicity as a thalidomide-dependent  
842 cereblon substrate. *Nat. Chem. Biol.* **14**, 981–987 (2018).
- 843 11. Kohlhase, J. *et al.* SALL4 mutations in Okihiro syndrome (Duane-radial ray syndrome),  
844 acro-renal-ocular syndrome, and related disorders. *Hum. Mutat.* **26**, 176–183 (2005).
- 845 12. Akiyama, R. *et al.* Sall4-Gli3 system in early limb progenitors is essential for the  
846 development of limb skeletal elements. *Proc. Natl. Acad. Sci. U.S.A.* **112**, 5075–5080  
847 (2015).
- 848 13. Suliman, B. A., Xu, D. & Williams, B. R. G. The promyelocytic leukemia zinc finger  
849 protein: two decades of molecular oncology. *Front Oncol* **2**, 74 (2012).
- 850 14. Barna, M., Hawe, N., Niswander, L. & Pandolfi, P. P. Plzf regulates limb and axial  
851 skeletal patterning. *Nat. Genet.* **25**, 166–172 (2000).
- 852 15. Barna, M., Pandolfi, P. P. & Niswander, L. Gli3 and Plzf cooperate in proximal limb  
853 patterning at early stages of limb development. *Nature* **436**, 277–281 (2005).
- 854 16. Fischer, S. *et al.* Biallelic loss of function of the promyelocytic leukaemia zinc finger

- 855 (PLZF) gene causes severe skeletal defects and genital hypoplasia. *J. Med. Genet.* **45**,  
856 731-737 (2008).
- 857 17. Sievers, Q. L. *et al.* Defining the human C2H2 zinc finger degrome targeted by  
858 thalidomide analogs through CRBN. *Science* **362**, (2018).
- 859 18. Ando, Y., Fuse, E. & Figg, W. D. Thalidomide metabolism by the CYP2C subfamily.  
860 *Clinical Cancer Research* **8**, 1964–1973 (2002).
- 861 19. Chowdhury, G. *et al.* Human liver microsomal cytochrome P450 3A enzymes involved  
862 in thalidomide 5-hydroxylation and formation of a glutathione conjugate. *Chem. Res.*  
863 *Toxicol.* **23**, 1018–1024 (2010).
- 864 20. Yamamoto, T. *et al.* Synthesis, configurational stability and stereochemical biological  
865 evaluations of (S)- and (R)-5-hydroxythalidomides. *Bioorg. Med. Chem. Lett.* **19**, 3973-  
866 3976 (2009).
- 867 21. Fischer, E. S. *et al.* Structure of the DDB1-CRBN E3 ubiquitin ligase in complex with  
868 thalidomide. *Nature* **512**, 49–53 (2014).
- 869 22. Mori, T. *et al.* Structural basis of thalidomide enantiomer binding to cereblon. *Sci Rep* **8**,  
870 1294 (2018).
- 871 23. Therapontos, C., Erskine, L., Gardner, E. R., Figg, W. D. & Vargesson, N. Thalidomide  
872 induces limb defects by preventing angiogenic outgrowth during early limb formation.  
873 *Proc. Natl. Acad. Sci. U.S.A.* **106**, 8573–8578 (2009).
- 874 24. Lepper, E. R., Smith, N. F., Cox, M. C., Scripture, C. D. & Figg, W. D. Thalidomide  
875 metabolism and hydrolysis: mechanisms and implications. *Curr. Drug Metab.* **7**, 677–  
876 685 (2006).
- 877 25. Kazuki, Y. *et al.* Thalidomide-induced limb abnormalities in a humanized CYP3A  
878 mouse model. *Sci Rep* **6**, 21419 (2016).
- 879 26. Sawasaki, T., Ogasawara, T., Morishita, R. & Endo, Y. A cell-free protein synthesis  
880 system for high-throughput proteomics. *Proc. Natl. Acad. Sci. U.S.A.* **99**, 14652–14657  
881 (2002).
- 882 27. Tadokoro, D. *et al.* Characterization of a caspase-3-substrate kinome using an N- and C-  
883 terminally tagged protein kinase library produced by a cell-free system. *Cell Death Dis*  
884 **1**, e89–e89 (2010).
- 885 28. Takahashi, H. *et al.* Establishment of a Wheat Cell-Free Synthesized Protein Array  
886 Containing 250 Human and Mouse E3 Ubiquitin Ligases to Identify Novel Interaction  
887 between E3 Ligases and Substrate Proteins. *PLoS ONE* **11**, e0156718 (2016).



- 888 29. Nemoto, K. *et al.* Tyrosine phosphorylation of the GARU E3 ubiquitin ligase promotes  
889 gibberellin signalling by preventing GID1 degradation. *Nature Communications* **8**, 1004  
890 (2017).
- 891 30. Hideshima, T. *et al.* Thalidomide and its analogs overcome drug resistance of human  
892 multiple myeloma cells to conventional therapy. *Blood* **96**, 2943–2950 (2000).
- 893 31. Yano, T. *et al.* AGIA Tag System Based on a High Affinity Rabbit Monoclonal Antibody  
894 against Human Dopamine Receptor D1 for Protein Analysis. *PLoS ONE* **11**, e0156716  
895 (2016).
- 896 32. An, J. *et al.* pSILAC mass spectrometry reveals ZFP91 as IMiD-dependent substrate of  
897 the CRL4CRBN ubiquitin ligase. *Nature Communications* **8**, 15398 (2017).
- 898 33. Liška, F. *et al.* Targeting of the Plzf Gene in the Rat by Transcription Activator-Like  
899 Effector Nuclease Results in Caudal Regression Syndrome in Spontaneously  
900 Hypertensive Rats. *PLoS ONE* **11**, e0164206 (2016).
- 901 34. Uhlén, M. *et al.* A human protein atlas for normal and cancer tissues based on antibody  
902 proteomics. *Mol. Cell Proteomics* **4**, 1920–1932 (2005).
- 903 35. Xu, D. *et al.* Promyelocytic leukemia zinc finger protein regulates interferon-mediated  
904 innate immunity. *Immunity* **30**, 802–816 (2009).
- 905 36. Savage, A. K. *et al.* The transcription factor PLZF directs the effector program of the  
906 NKT cell lineage. *Immunity* **29**, 391–403 (2008).
- 907 37. Kovalovsky, D. *et al.* The BTB-zinc finger transcriptional regulator PLZF controls the  
908 development of invariant natural killer T cell effector functions. *Nat. Immunol.* **9**, 1055–  
909 1064 (2008).
- 910 38. Serafini, N., Vosshenrich, C. A. J. & Di Santo, J. P. Transcriptional regulation of innate  
911 lymphoid cell fate. *Nat. Rev. Immunol.* **15**, 415–428 (2015).
- 912 39. Fink, E. C. *et al.* CrbnI391V is sufficient to confer in vivo sensitivity to thalidomide and  
913 its derivatives in mice. *Blood* **132**, 1535–1544 (2018).
- 914 40. Gemechu, Y. *et al.* Humanized cereblon mice revealed two distinct  
915 therapeutic pathways of immunomodulatory drugs. *Proc. Natl. Acad. Sci.*  
916 *U.S.A.* **115**, 11802–11807 (2018).
- 917 41. Beckman, R. & Kampf, H. H. Zur quantitativen Bestimmung und zum qualitativen  
918 Nachweis von N-phthalyl-glutaminsäureimid (thalidomide). *Arzneimittelforschung* **11**,  
919 45-47 (1961).
- 920 42. Sawasaki, T. *et al.* Arabidopsis HY5 protein functions as a DNA-binding tag for

- 921 purification and functional immobilization of proteins on agarose/DNA microplate.  
922 *FEBS Lett* **582**, 221-228 (2008).
- 923 43. Nagase, T. *et al.* Exploration of Human ORFeome- High-Throughput Preparation of  
924 ORF Clones and Efficient Characterization of Their Protein Products. *DNA Res.* **15**, 137-  
925 149 (2008).
- 926 44. Hamburger, V. & Hamilton, H. L. A series of normal stages in the development of the  
927 chick embryo. *J. Morphol.* **88**, 49-92 (1951).
- 928 45. Tonegawa, A., Funayama, N, Ueno, N., & Takahashi, Y. Mesodermal subdivision along  
929 the mediolateral axis in chicken controlled by different concentrations of BMP-4.  
930 *Development* **124**, 1975-84 (1997).
- 931 46. Sato, Y. *et al.* Notch signaling mediates the segmental specification of angioblasts in  
932 somites and their directed migration toward the dorsal aorta in avian embryos. *Dev. Cell*  
933 **14**, 890-901 (2008).
- 934 47. Saito, D., Takase, Y., Murai, H. & Takahashi, Y. The dorsal aorta initiates a molecular  
935 cascade that instructs sympatho-adrenal specification. *Science* **336**, 1578-1581 (2012).
- 936 48. Seki, R. *et al.* AP-2 $\beta$  is a transcriptional regulator for determination of digit length in  
937 tetrapods. *Dev. Biol.* **407**, 75-89 (2015).
- 938

## 939 **Acknowledgements**

940 We thank H. Yamakawa (Kazusa DNA Research Institute) for the vector construction for the  
941 human protein array, C. Takahashi and C. Furukawa for technical assistance, and the Applied  
942 Protein Research Laboratory of Ehime University. We also thank Prof. F. Tokunaga and Dr.  
943 D. Oikawa (Osaka City University) for providing the DLBCL cell lines. This work was  
944 mainly supported by the Platform Project for Supporting Drug Discovery and Life Science  
945 Research (Basis for Supporting Innovative Drug Discovery and Life Science Research  
946 (BINDS)) from AMED under Grant Number JP19am0101077 (H. Takeda, T.S.), a Grant-in-  
947 Aid for Scientific Research on Innovative Areas (JP16H06579 for T.S.) from the Japan  
948 Society for the Promotion of Science (JSPS). This work was also partially supported by JSPS  
949 KAKENHI (JP17J08477 for S.Y., JP16H04729, JP19H03218 for T.S., JP17H06112 for N.S.,  
950 and JP18H02446, JP18H04811, JP18H04756 for K.T), a Grant-in-Aid for JSPS Research  
951 Fellow (JP17J08477 for S.Y) from JSPS., and Takeda Science Foundation. Establishment



952 and screening of the human protein array used in this study was conducted in Proteo-Science  
953 Center at Ehime University with the support of MEXT.

954

### 955 **Author Contributions**

956 S.Y. performed the biochemical, molecular, and cellular biology experiments. T.I. and  
957 H.Takeda constructed the human protein array. H.Takahashi supported the screening. E.T.  
958 and N.S. synthesized and analysed the 5-hydroxythalidomide. H.M., D.S., G.A., T.Suzuki,  
959 and K.T. performed the chicken teratogenesis studies. S.Y. and T.Sawasaki analysed the data,  
960 designed the study, wrote the paper, and all authors contributed to the manuscript.

961

### 962 **Additional information**

963 **Supplementary Information** accompanies this paper at XXXXXX.

964

965 **Competing interests:** The authors declare no competing financial interests.

966

967 **Reprints and permission** information is available online at XXXXXXXX.

968

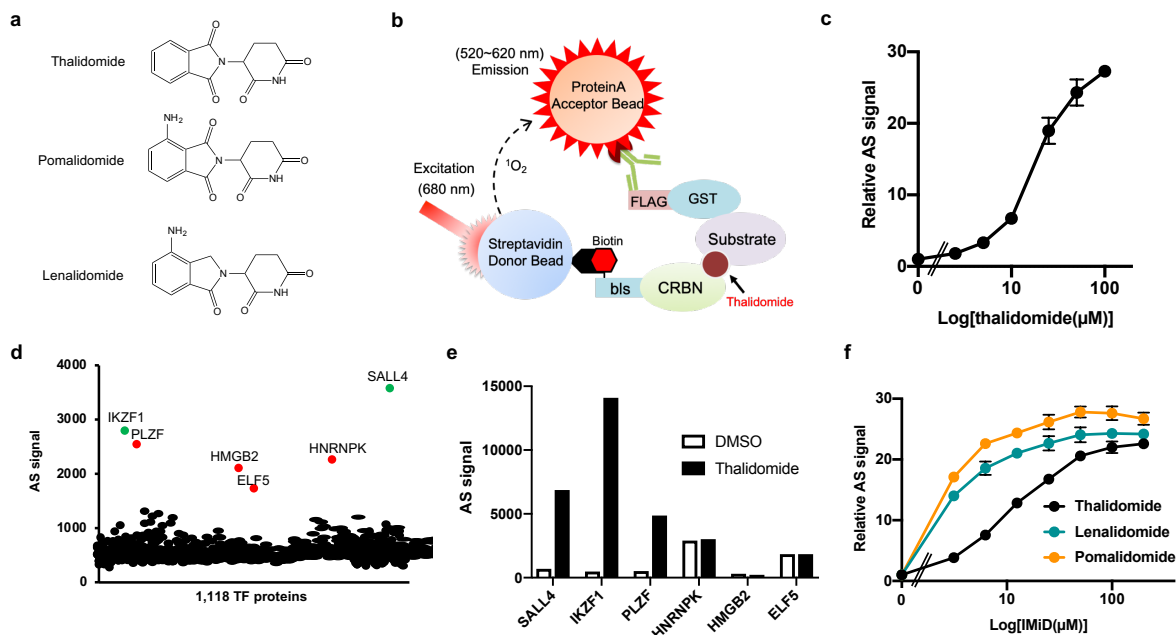

969

970 **Figure 1. Identification of thalidomide-dependent interactors of CRBN using a cell-free**  
 971 **based human TF protein array**

972 **a**, Chemical structures of thalidomide, pomalidomide and lenalidomide. **b**, Schematic  
 973 diagram of the thalidomide-dependent *in vitro* binding assay between CRBN and substrates  
 974 using AlphaScreen technology. **c**, Detection of luminescent signals of thalidomide-dependent  
 975 interactions between bls-CRBN and FLAG-GST-IKZF1. Dose-dependent signals (DMSO,  
 976 2.5, 5, 10, 25, 50, or 100  $\mu$ M thalidomide) was analysed with an *in vitro* binding assay using  
 977 AlphaScreen technology. **d**, Results of *in vitro* high-throughput screening, targeting 1,118  
 978 human transcription factors. Green and red spots denote known neosubstrates and candidate  
 979 clones, respectively. **e**, Confirmation of thalidomide-dependency on six hit proteins using an  
 980 *in vitro* binding assay. Interaction between bls-CRBN and FLAG-GST-protein in the  
 981 presence of DMSO or 50  $\mu$ M thalidomide was detected using AlphaScreen technology. **f**, *In*  
 982 *vitro* binding assay for thalidomide, pomalidomide, and lenalidomide. Interaction between  
 983 bls-CRBN and FLAG-GST-PLZF in the presence of DMSO, (3.125, 6.25, 12.5, 25, 50, 100,  
 984 or 200  $\mu$ M) thalidomide, pomalidomide or lenalidomide was analysed using AlphaScreen  
 985 technology. All relative AS (AlphaScreen) signals were expressed as relative luminescent  
 986 signal with luminescent signal of DMSO as one, and error bars mean  $\pm$  standard deviation  
 987 (n=3).

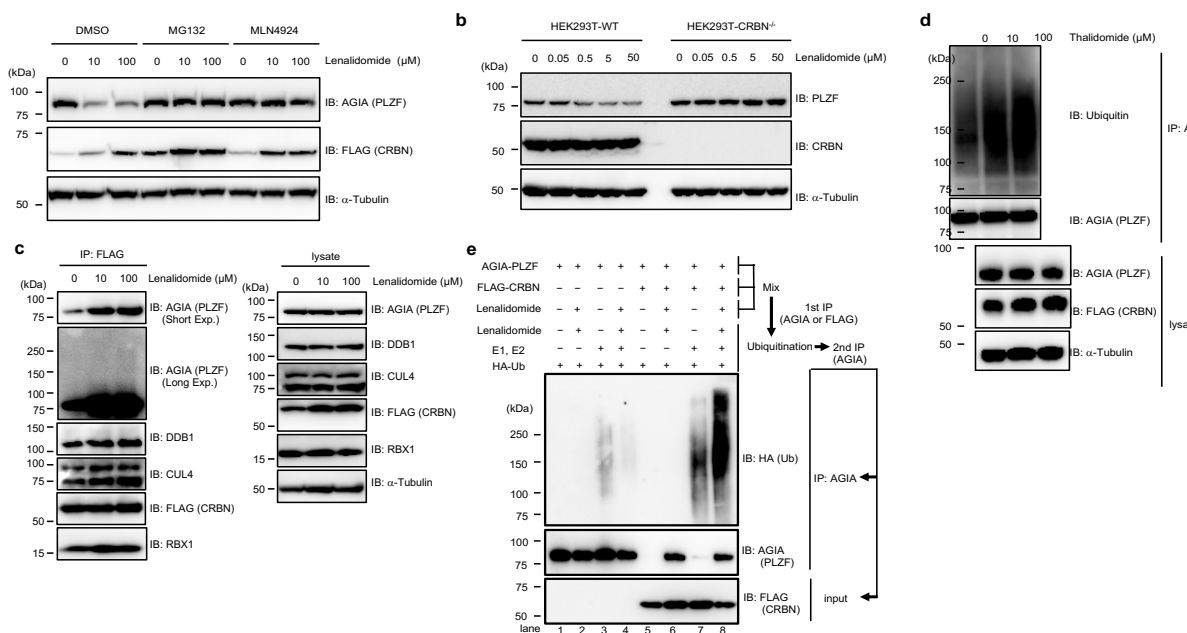

988 **Figure 2. PLZF is a substrate of CRL4<sup>CRBN</sup> with thalidomide and lenalidomide for E3**  
 989 **ubiquitin ligase**

990 **a**, Immunoblot analysis of AGIA-PLZF protein levels in AGIA-PLZF and FLAG-CRBN  
 991 expressing HEK293T cells treated with DMSO or lenalidomide in the presence of DMSO,  
 992 MG132, or MLN4924 for 9 h. **b**, Immunoblot analysis of endogenous PLZF protein levels  
 993 in HEK293T cells or CRBN<sup>-/-</sup> HEK293T cells treated with DMSO or lenalidomide for 24 h.  
 994 **c**, Immunoprecipitation of FLAG-CRBN in FLAG-CRBN and AGIA-PLZF expressing  
 995 HEK293T cells treated with DMSO or lenalidomide in the presence of DMSO or MG132 for  
 996 8 h. Components of CRL<sup>FLAG-CRBN</sup> and AGIA-PLZF were detected using each specific  
 997 antibody, as indicated. **d**, Ubiquitination of AGIA-PLZF in AGIA-PLZF and FLAG-CRBN  
 998 expressing CRBN<sup>-/-</sup> HEK293T cells treated with DMSO or thalidomide in the presence of  
 999 DMSO or MG132 for 10 h. AGIA-PLZF was immunoprecipitated using anti-AGIA antibody  
 1000 and the polyubiquitin chain on AGIA-PLZF was analysed by immunoblot. **e**, *In vitro* binding  
 1001 and ubiquitination assay of AGIA-PLZF. Empty vector, AGIA-PLZF, or FLAG-CRBN  
 1002 expressing HEK293T cells were lysed and the lysates were mixed. The first  
 1003 immunoprecipitation with anti-AGIA or anti-FLAG antibodies was performed in the  
 1004 presence of DMSO or 200 μM lenalidomide. The purified AGIA-PLZF or CRL4<sup>FLAG-CRBN</sup>  
 1005 complex, including AGIA-PLZF and FLAG-CRBN, was incubated with recombinant E1, E2,  
 1006 and HA-ubiquitin in the presence of DMSO or 200 μM lenalidomide, and the second  
 1007 immunoprecipitation was performed using anti-AGIA antibody. Ubiquitination of PLZF was  
 1008 analysed by immunoblot.

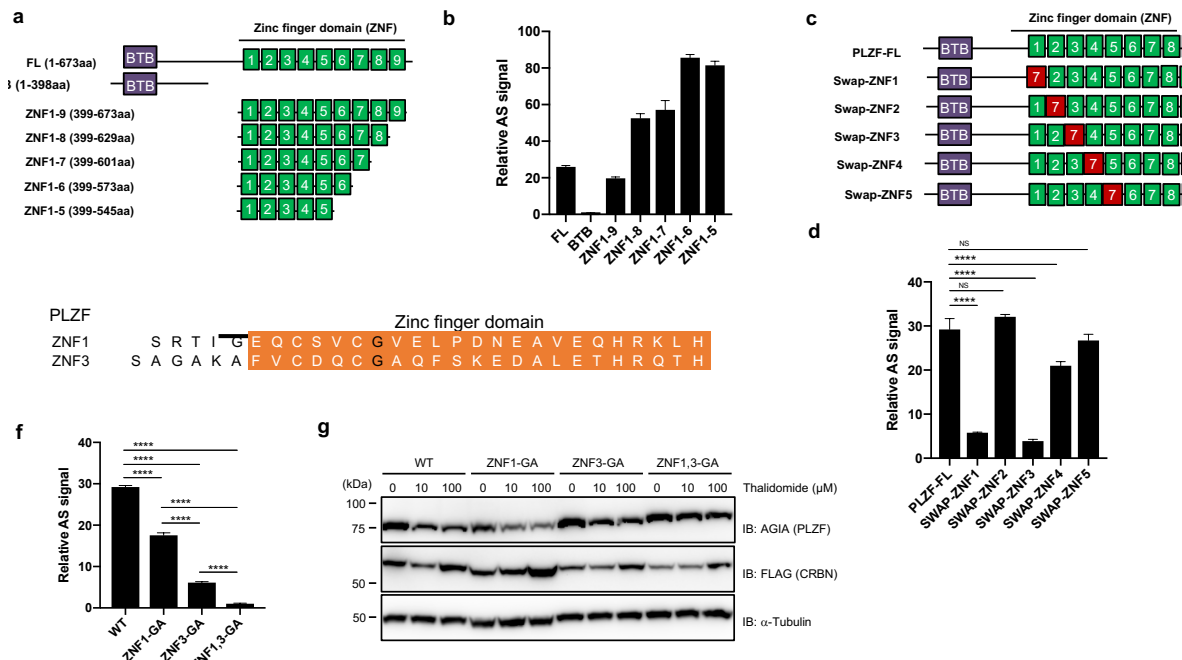

1009

1010

### Figure 3. Interaction regions in PLZF for binding to CRBN with thalidomide

1011

**a**, Schematic diagram of PLZF and truncated PLZFs. **b**, *In vitro* binding assay using truncated

1012

PLZF. Thalidomide-dependent interaction between bls-CRBN and FLAG-GST-PLZF-full

1013

length (FL) or truncated FLAG-GST-PLZF was analysed in the presence of DMSO or 50

1014

$\mu$ M thalidomide using AlphaScreen technology. **c**, Schematic diagram of swapped PLZF

1015

mutants. **d**, *In vitro* binding assay using swapped PLZF mutants was performed using the

1016

same procedure as in Figure 3b. **e**, Amino acid sequences of ZNF1 and ZNF3 in PLZF. **f**, *In*

1017

*in vitro* binding assay using point mutants of PLZF was performed using the same procedure as

1018

in Figure 3b. **g**, Immunoblot analysis of AGIA-PLZF protein levels in FLAG-CRBN and

1019

PLZF-WT, PLZF-ZNF1-GA, PLZF-ZNF3-GA, or PLZF-ZNF1,3-GA expressing CRBN<sup>-/-</sup>

1020

HEK293T cells treated with DMSO or thalidomide for 16 h. All relative AS (AlphaScreen)

1021

signals were expressed as relative luminescent signal with luminescent signal of DMSO as

1022

one. Error bars mean  $\pm$  standard deviation (n = 3) and *P* values were calculated by one-way

1023

ANOVA with Tukey's post-hoc test (NS = Not Significant, and \*\*\*\**P* < 0.0001).

1024

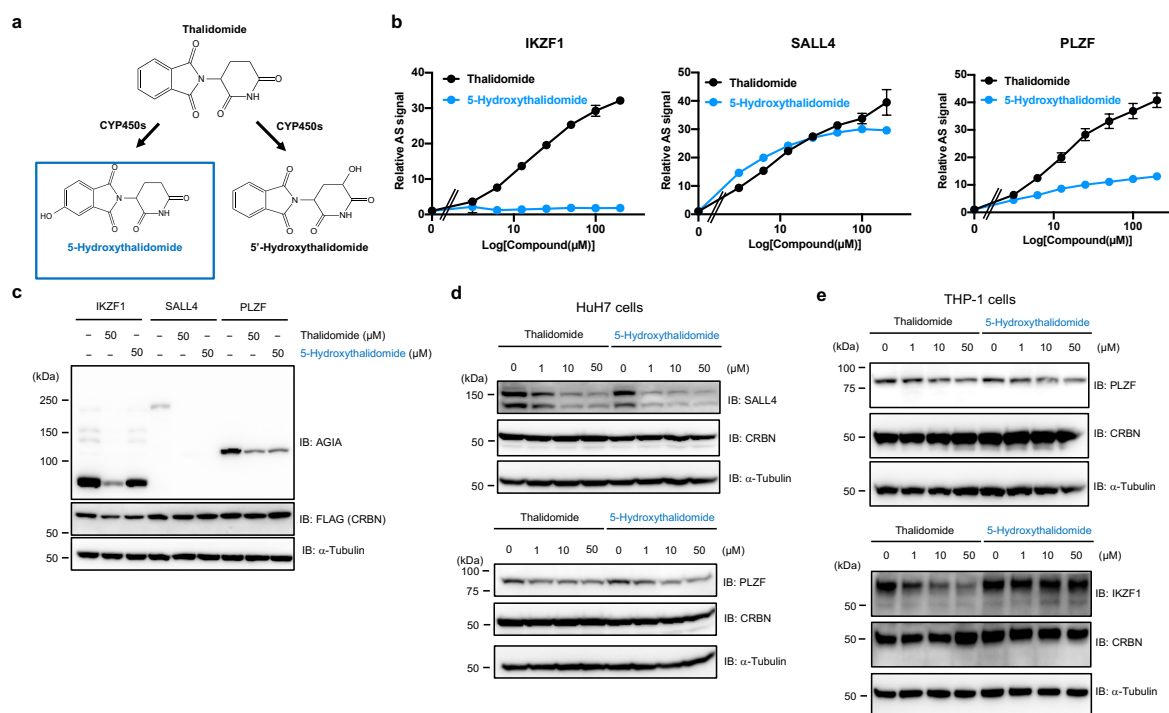

1025

1026 **Figure 4. 5-Hydroxythalidomide induces degradation of PLZF and SALL4 by CRBN**

1027 **a**, Schematic diagram of thalidomide metabolites by CYPs. **b**, *In vitro* binding assay for

1028 thalidomide and 5-hydroxythalidomide. Interaction between bls-CRBN and FLAG-GST-

1029 IKZF1, -SALL4, -PLZF in the presence of DMSO, thalidomide or 5-hydroxythalidomide

1030 (3.125, 6.25, 12.5, 25, 50, 100, or 200  $\mu$ M) was analysed using AlphaScreen technology. **c**,

1031 Immunoblot analysis of AGIA-PLZF, AGIA-SALL4, or AGIA-PLZF in FLAG-CRBN

1032 expressing CRBN<sup>-/-</sup> HEK293T cells treated with DMSO, thalidomide, or 5-

1033 hydroxythalidomide for 16 h. **d**, Immunoblot analysis of endogenous SALL4 or PLZF

1034 protein levels in HuH7 cells treated with DMSO, thalidomide, or 5-hydroxythalidomide for

1035 24 h. **e**, Immunoblot analysis of endogenous PLZF or IKZF1 protein levels in THP-1 cells

1036 treated with DMSO, thalidomide, or 5-hydroxythalidomide for 24 h.

1037

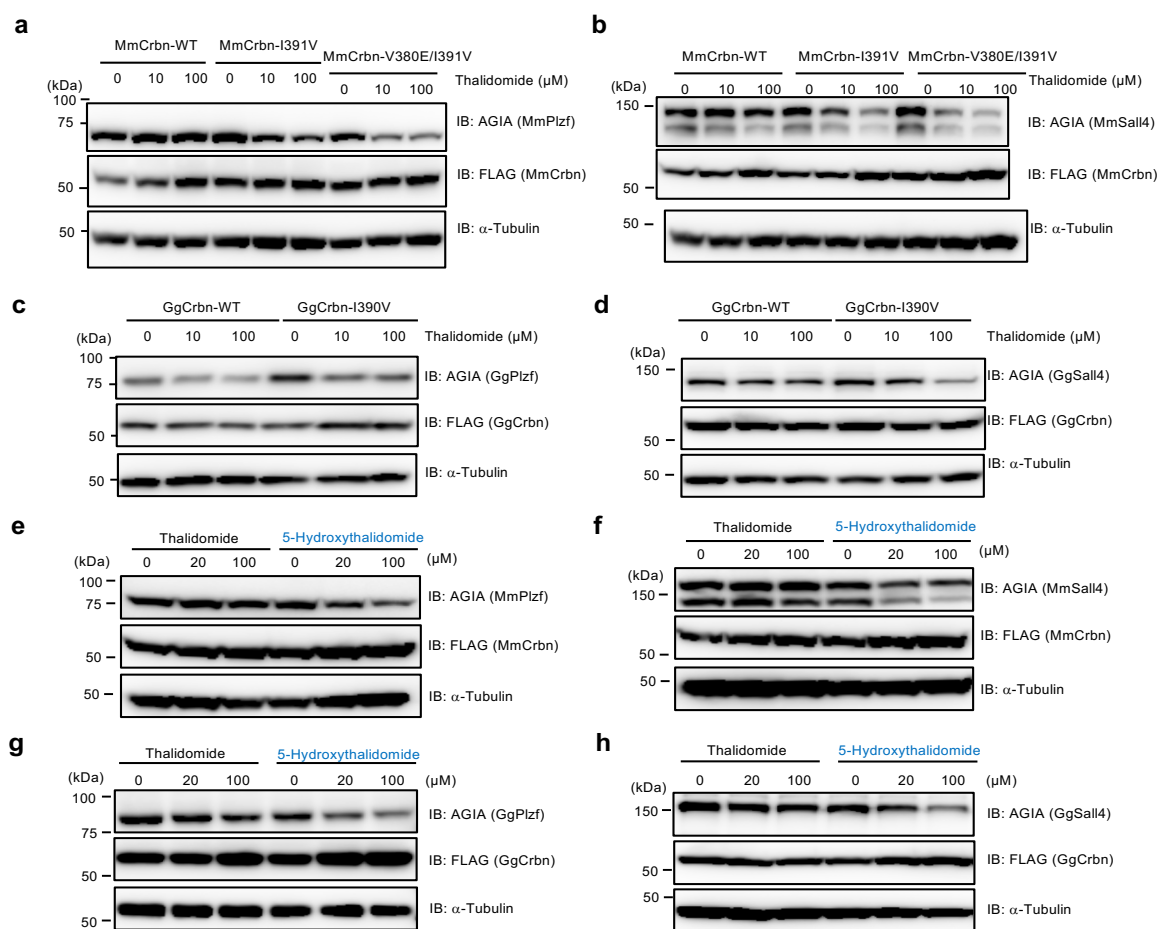

1038

1039 **Figure 5. Crbn-dependent degradation of Plzf and Sall4 from mouse and chicken by**  
 1040 **treatment with thalidomide and 5-hydroxythalidomide**

1041 **a, b,** Immunoblot analysis of AGIA-MmPlzf (**a**) or -MmSall4 (**b**) in FLAG-MmCrbn-WT, -  
 1042 MmCrbn-I391V or -MmCrbn-V380E/I391V expressing CRBN<sup>-/-</sup> HEK293T cells treated  
 1043 with DMSO or thalidomide for 16 h. **c, d,** Immunoblot analysis of AGIA-GgPlzf (**c**) or -  
 1044 GgSall4 (**d**) in FLAG-GgCrbn-WT or -GgCrbn-I390V expressing CRBN<sup>-/-</sup> HEK293T cells  
 1045 treated with DMSO or thalidomide for 16 h. **e, f,** Immunoblot analysis of AGIA-MmPlzf (**e**)  
 1046 or -MmSall4 (**f**) in FLAG-MmCrbn-WT expressing CRBN<sup>-/-</sup> HEK293T cells treated with  
 1047 indicated concentration of DMSO, thalidomide or 5-hydroxythalidomide for 16 h. **g, h,**  
 1048 Immunoblot analysis of AGIA- GgPlzf (**g**) or -GgSall4 (**h**) in FLAG-GgCrbn-WT expressing

1049 CRBN<sup>-/-</sup> HEK293T cells treated with indicated concentration of DMSO, thalidomide or 5-  
1050 hydroxythalidomide for 16 h.

1051

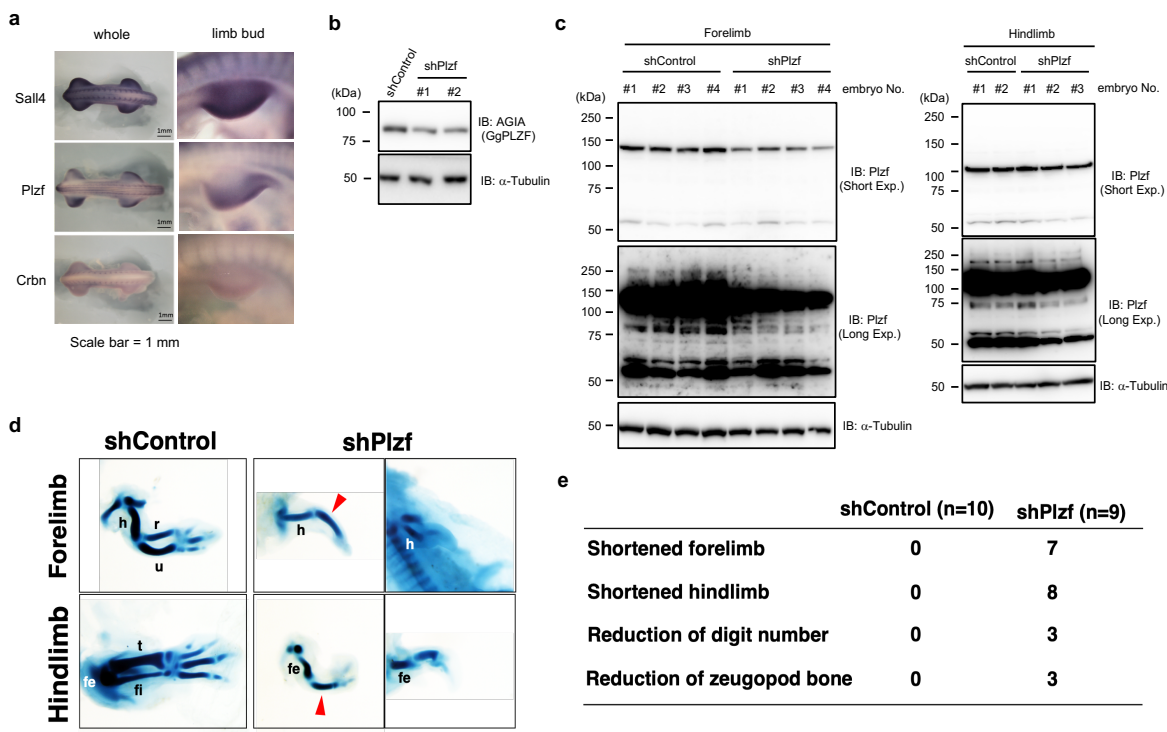

1052

1053 **Figure 6. Downregulation of Plzf causes abnormal limb development in chicken embryo**  
 1054 **a**, *Sall4*, *Plzf* or *Crbn* mRNA expression in E4 chicken embryos was analysed by whole-  
 1055 mount *in situ* hybridization. Left panel shows whole chicken embryo and right panel shows  
 1056 right forelimb bud. **b**, Immunoblot analysis of AGIA-GgPlzf in AGIA-GgPlzf expressing  
 1057 DF-1 cells transfected with shControl (shGFP) or shPlzf expression vector. **c**, Immunoblot  
 1058 analysis of Plzf from tissue of chicken forelimb or hindlimb bud. Endogenous Plzf protein  
 1059 expression was detected by immunoblot using chicken embryos infected with RCAN virus  
 1060 packaging shControl or shPlzf (forelimb shControl (n = 4), forelimb shPlzf (n = 4), hindlimb  
 1061 shControl (n = 2) or hindlimb shPlzf (n = 4)). **d**, Limb skeletal stained with Victoria blue.  
 1062 Skeletal patterning of forelimb and hindlimb in E6 chicken embryos infected RCAN virus  
 1063 packaging shControl (n = 10) or shPlzf (n = 9) were analysed by Victoria blue staining. h;  
 1064 humerus, r; radius, u; ulna, fe; femur, fi; fibula, t; tibia. **e**, Teratogenic phenotypes of chicken  
 1065 embryos in Fig. 6d.



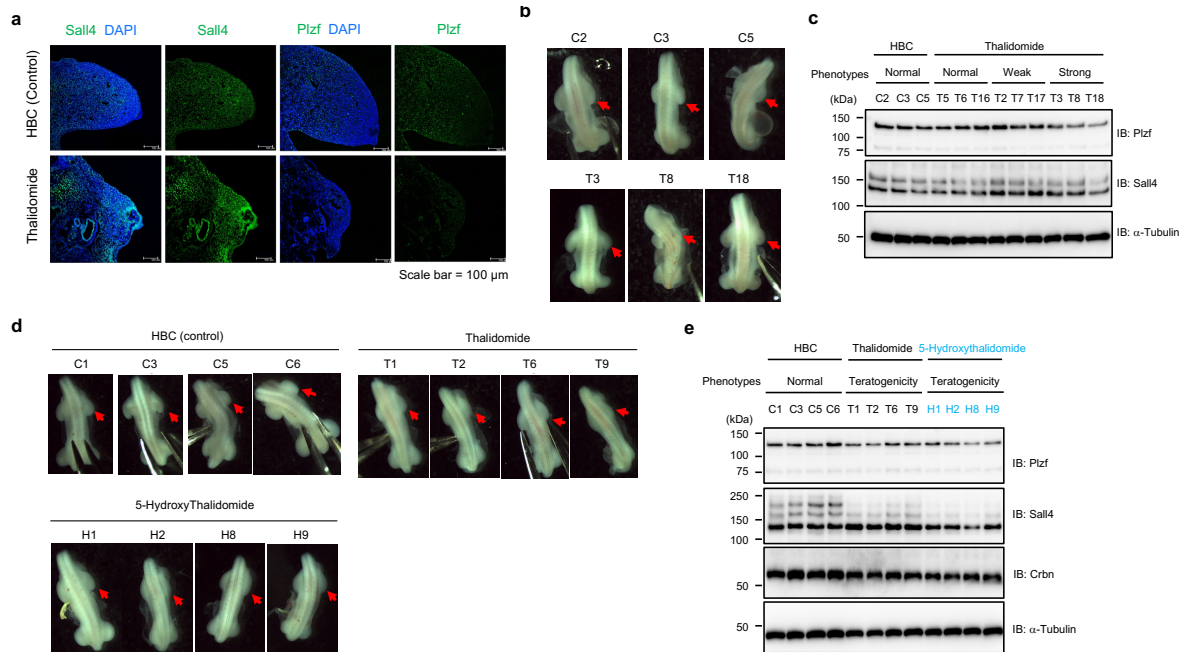

1066

1067 **Figure 7. Thalidomide induces degradation of PLZF in abnormal chick limb buds**

1068 **a**, Immunohistochemical staining of Sall4 or Plzf in chicken forelimb bud. Endogenous Sall4  
 1069 or Plzf protein expression was detected using forelimb bud section in chicken embryos  
 1070 treated with HBC (n = 4) or 1  $\mu$ g/ $\mu$ l thalidomide (n = 4). **b**, Photographs show chicken  
 1071 embryos treated with HBC (control, n = 6, C2, C3, and C5) or strong phenotype (1  $\mu$ g/ $\mu$ l  
 1072 thalidomide, n = 18, T3, T8, T18) corresponding to immunoblot analysis in Figure 7c. Red  
 1073 arrows show treated regions. **c**, Endogenous Plzf or Sall4 protein expression in chicken  
 1074 embryos in Fig. 7b was detected by immunoblot. **d**, Photographs show chicken embryos  
 1075 treated with HBC (control, n = 10, C1, C3, C5 and C6), 1  $\mu$ g/ $\mu$ l thalidomide (n = 11, T1, T2,  
 1076 T6, T9) or 1  $\mu$ g/ $\mu$ l 5-hydroxythalidomide (n = 10, H1, H2, H8, H9) corresponding to  
 1077 immunoblot analysis in Figure 6d. Red arrows show treated regions. **e**, Endogenous Plzf or  
 1078 Sall4 protein expression in chicken embryos in Fig. 7d was detected by immunoblot.

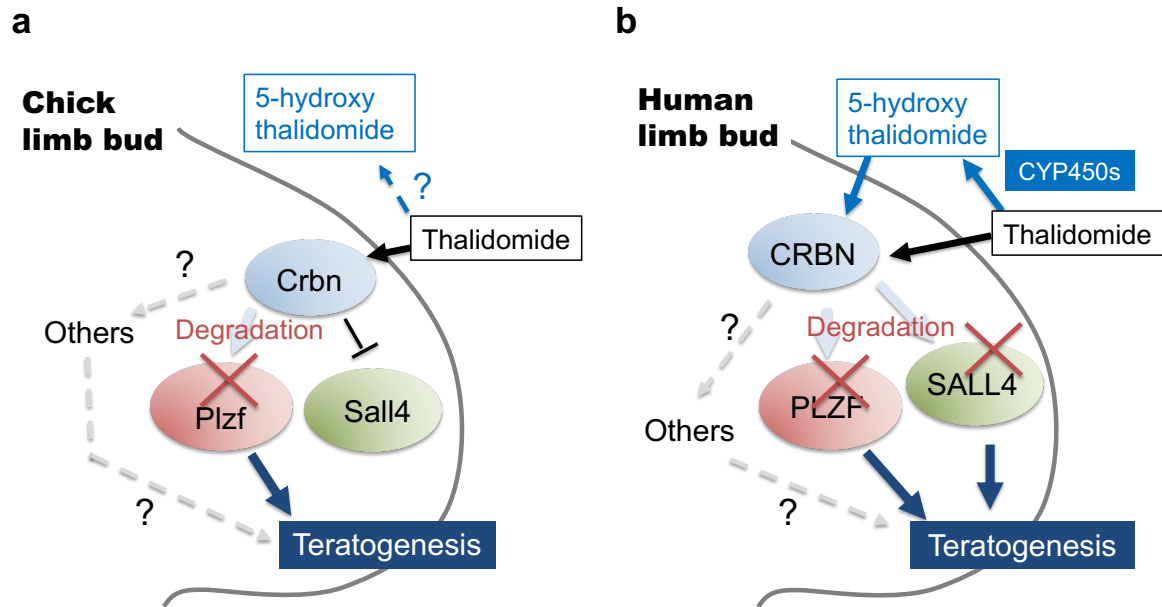

1079

1080

1081

1082

1083

**Figure 8. Model cartoon of thalidomide-induced teratogenicity in chicken or human limb bud**

**a**, Model of thalidomide teratogenesis in chicken limb bud. **b**, Model of thalidomide teratogenesis in human limb bud.
